1 *Title:* The dynamic Nexus: Gap junctions control protein localization and mobility in distinct and  
2 surprising ways.

3 *Running Title:* Gap junctions and cell morphology

4 Sean McCutcheon<sup>\*@</sup>, Randy F. Stout<sup>#\*@</sup>, Jr., David C. Spray<sup>\*\*†</sup>

5 <sup>@</sup>these authors contributed equally to these studies

6 <sup>\*</sup>Dominick P. Purpura Department of Neuroscience

7 Albert Einstein College of Medicine,

8 1410 Pelham Parkway South, Bronx, NY 10461, USA

9 <sup>#</sup> The New York Institute of Technology College of Osteopathic Medicine, Department of  
10 Biomedical Sciences, 101 Northern Blvd., Old Westbury, NY 11586, USA

11 <sup>†</sup>Corresponding author: [david.spray@einstein.yu.edu](mailto:david.spray@einstein.yu.edu)

12 Acknowledgments: Super-resolution imaging was performed with support of the NYIT Imaging  
13 Center. The NYIT Center for Biomedical Innovation provided RFS with computational tools for  
14 image processing and analysis

15 Key words: gap junction nexus, connexin 43, Cx43, astrocyte endfeet, supramolecular structure,  
16 tight junction.

17

18 **Summary Statement**

19 Gap junctions are clustered membrane channels in plasma membrane of astrocytes and other  
20 cells. We report new information on how gap junctions control location and mobility of other  
21 astrocyte proteins.

22 **Abstract**

23 Gap junction (GJ) channels permit molecules, such as ions, metabolites and second  
24 messengers, to transfer between cells. Their function is critical for numerous cellular  
25 interactions. GJ channels are composed of Connexin (Cx) hexamers paired across extracellular  
26 space and typically form large rafts of clustered channels, called plaques, at cell appositions.  
27 Cxs together with molecules that interact with GJ channels make up a supramolecular structure  
28 known as the GJ Nexus. While the stability of connexin localization in GJ plaques has been  
29 studied, mobility of other Nexus components has yet to be addressed. Colocalization analysis of  
30 several nexus components and other membrane proteins reveal that certain molecules are  
31 excluded from the GJ plaque (Aquaporin 4, EAAT2b), while others are quite penetrant (lipophilic  
32 molecules, Cx30, ZO-1, Occludin). Fluorescence recovery after photobleaching (FRAP) of  
33 tagged Nexus-associated proteins showed that mobility in plaque domains is affected by  
34 mobility of the Cx proteins. These novel findings indicate that the GJ Nexus is a dynamic  
35 membrane organelle, with cytoplasmic and membrane-embedded proteins binding and diffusing  
36 according to distinct parameters.

37 *Abbreviations:* AQP4, aquaporin 4; OAP, orthogonal array of particles formed by AQP4; GJ,  
38 Gap Junction; Cx, connexin; Cx30, connexin 30; Cx43, connexin 43; EAAT2b, excitatory amino  
39 acid transporter 2b; CC2-DMPE, coumarin phospholipid; plmtGFP, palmitoylated GFP; b5Ext,  
40 b5Extended; ZO-1, zona occludens 1; Ocln, occludin; EBFP2, enhanced blue fluorescent  
41 protein 2; FRAP, fluorescence recovery after photobleaching; GFP, green fluorescent protein;  
42 HEPES, 4-(2-hydroxyethyl)-1-piperazineethanesulfonic acid; msfGFP, monomerized  
43 superfolder green fluorescent protein; ROI, region of interest; RT, room temperature; sfGFP,  
44 non-monomerized superfolder green fluorescent protein; GFP-Cx43tXXX, rat Cx43 tagged with  
45 GFP on the amino-terminus truncated at the indicated amino acid (i.e. GFP-Cx43t258 is  
46 truncated by mutagenesis of lysine 258 to a stop codon); Cx43cysICT, rat Cx43 with cysteine  
47 residues 260, 271, and 298 mutated to alanine; TJ, tight junction

48

49

## 50 **Introduction**

51 Gap junction (GJ) channels are paired hexameric structures composed of connexin (Cx)  
52 proteins<sup>1</sup>. More than twenty Cx isoforms are expressed in specific patterns in most cell  
53 populations throughout the body. Gap junction plaques are structures made up of aggregated  
54 gap junction channels, and interactions between connexins and other integral membrane and  
55 non-membrane tethered proteins make up the gap junction Nexus<sup>2</sup>. The gap junction plaque  
56 has been regarded as a highly organized, rigid contact area between cells, and its biochemical  
57 integrity and close particle packing enabled the pioneering isolation, purification and x-ray  
58 diffraction studies of its structure<sup>3</sup>. Recent live cell imaging of fluorescent protein tagged  
59 connexins has revealed that while some GJ plaques are quite stable over minutes of  
60 observation, including those comprised of the most commonly expressed gap junction protein  
61 Cx43, others such as Cx30, Cx26, and Cx36 are more fluid and can rearrange within tens of  
62 seconds<sup>4,5</sup>. Of note, Cx43 GJ plaque stability is governed by cysteine interactions at the  
63 cytoplasmic carboxyl-terminus as evidenced by increased fluidity when Cx43 was truncated at  
64 amino acid 258, and after replacement of cytoplasmic cysteine residues with alanine. Moreover,  
65 Cx43 mobility was found to be rapidly modifiable by cell-permeable reducing agents, indicating  
66 a dynamic and reversible process<sup>6</sup>.

67 It has long been recognized that gap junctions exist as plaques, and more recently it has  
68 been appreciated that other proteins bind to connexins to create a Nexus of molecules critical to  
69 intercellular signaling. However, the degree to which these interactions are stable and dictate  
70 the distribution of other channels, membrane components, and scaffolding molecules has not  
71 been thoroughly evaluated. Membrane-embedded proteins /molecules are constrained in their  
72 movement by the presence and organization of other proteins that interact within the membrane  
73 and by proteins that form cytoplasmic scaffolding or extracellular aggregating lattices. As  
74 shown by freeze fracture electron microscopy, core transmembrane proteins of tight and gap  
75 junctions are often intermixed, with enastomosing tight junction (TJ) strands encompassing gap  
76 junction plaques. Direct interaction between core proteins of each junction type have been  
77 reported<sup>7,8</sup>, and binding of Cx43 to PDZ domain of the TJ adaptor protein zonula occludens-1  
78 (ZO-1) is believed to play a role in regulating GJ size<sup>9</sup>. In addition, interdigitation of gap junction  
79 and tight junction particles at the margin between apical and basolateral domains of polarized  
80 cells creates a potential signaling domain where intercellular signaling molecules might regulate  
81 extracellular tightness. However, impact of GJ-TJ molecular interactions on overall GJ plaque  
82 structure, stability and dynamics has not been fully elucidated.

83 To gain insight into the dynamic relationship between Cx43 and other cellular  
84 components, we have determined the diffusivity and location of other molecules relative to the  
85 Cx43 plaque. For these studies we selected for comparison small fluorescent lipids and lipid-  
86 tethered fluorescent proteins, the water channel Aquaporin4 (AQP4) whose presence with Cx43  
87 at astrocyte endfeet regulates ion homeostasis, a glutamate transporter (EAAT2b) that provides  
88 astrocytes with a mechanism to take up glutamate at active synapses, and junction-associated  
89 proteins (the other astrocyte gap junction protein Cx30, the tight junction proteins occludin and  
90 ZO-1).

91 Fluidity of gap junction channels within the plaque and stability of interactions between  
92 connexins and a few of their binding partners have been quantified in previous studies by  
93 fluorescence recovery after photobleaching (FRAP)<sup>10</sup>. Here we examine the mobility of a variety  
94 of membrane-embedded proteins and other gap junction Nexus components in the presence of  
95 stable and fluidized Cx43 gap junctions. We tested whether Cx43 plaques exclude some  
96 molecules and permit diffusion of others. We tested if non-Cx43 molecules that enter the GJ  
97 plaque area are mobile. Finally, we tested whether increasing fluidity of the Cx43 plaques by C-  
98 terminus truncation or altering cytoplasmic cysteine residues (C260, 271, 298 mutated to  
99 alanine) increased fluidity of the GJ-associated proteins.

100

## 101 **Results**

### 102 **Gap junction plaques modify localization of small membrane-associated molecules**

103 The localization of membrane-associated molecules with respect to Cx43 GJ plaques  
104 was examined by two-channel confocal microscopy (see Fig 1A-C) and degree of overlap was  
105 quantified with Pearson correlation coefficients obtained from line scans along the junctional  
106 membrane (Fig 1 D-E). The coumarin-linked lipid CC2-DMPE was found to be distributed  
107 throughout the cells, labeling both plasma and intracellular membranes (Fig. 1A). It was also  
108 distributed rather uniformly in plaque and nonplaque domains, as determined by line-scans of  
109 the appositional membranes at the margin between plaque and nonplaque as identified with  
110 fluorescence of msfGFP-Cx43 (rat Cx43 with a monomerized GFP).

111 By contrast to the rather uniform distribution of the purely lipid probe throughout the cell  
112 membrane, the two small labeled membrane-embedded proteins that we examined (membrane  
113 localized, palmitoylated GFP and a single-pass transmembrane protein b5Extended-GFP)

114 showed uniform distribution within the non-junctional plasma membrane but appeared to be  
115 partially excluded from the plaque. For these experiments EBFP2-tagged rat Cx43 was  
116 expressed to allow visualization of the gap junction plaque. Distribution of membrane-tethered  
117 GFP (Figure 1B1) and b5Ext-GFP (Figure 1C1) was variable within the plaque region. We  
118 observed higher localization of both membrane-bound GFP proteins to areas where holes were  
119 present in the gap junction plaque in both images and line scans as indicated by magenta  
120 arrowheads in Figure 1. Averaged arbitrary intensity values for phospholipid and membrane-  
121 tethered components are shown for line scans across the transition from non-plaque membrane  
122 to plaque membrane (Figure 1D). Intermingling tendency of the phospholipid and membrane  
123 tethered fluorescent-tagged molecules within the gap junction plaque was assessed as the  
124 Pearson correlation of fluorescence across the two color-channels. This analysis indicated that  
125 presence within the plaque was slightly higher than in nonjunctional membrane for CC2-DMPE  
126 ( $0.32 \pm 0.62$ ), whereas membrane tethered GFP and b5Ext were largely excluded from the  
127 plaque ( $r = -0.78 \pm 0.23$  and  $-0.57 \pm 0.60$ , respectively) (Figure 1E).

128 We also examined the distribution of several multi-pass membrane-embedded proteins  
129 compared with that of Cx43 in plaques composed of EBFP2-Cx43. For this, we visualized Cx43  
130 simultaneously with the water channel AQP4, the glutamate transporter EAAT2b, the other  
131 major astrocyte-expressed gap junction protein Cx30, and the tight junction protein occludin  
132 (Ocln), as well as the cytoplasmic junction associated protein ZO-1 (Figure 2). AQP4 and  
133 EAAT2b showed similar distribution, being largely excluded from the Cx43 GJ plaque. Pearson  
134 coefficients for these two proteins were less than -0.5 ( $-0.66 \pm 0.24$  for AQP4 and  $-0.70 \pm 0.19$  for  
135 EAAT2b) as shown in Figure 2C. By contrast, Cx30 and Ocln fluorescence largely overlapped  
136 with Cx43 within the plaque. The overlapping distribution of these proteins was shown in line  
137 scans where local discontinuities (lacunae in the GJ plaque) were apparent in both traces  
138 (Figure 2A, arrows). Pearson coefficients were nearly +1,  $0.88 \pm 0.09$  for Cx30 and  $0.77 \pm 0.23$  for  
139 Ocln (Fig 2C, Rightmost graph). Cx43 binds the scaffolding protein ZO-1 through interaction  
140 between amino acids at the end of the carboxyl terminus of Cx43 and the PDZ-2 domain of ZO-  
141 1<sup>11,12</sup>. A fluorescent tag appended to the carboxyl terminus of Cx43 disrupts the binding site for  
142 ZO-1<sup>13</sup>; thus we again used our EBFP2-Cx43 construct with its free carboxyl-terminus to  
143 visualize the localization of Cx43 and ZO-1 in live cells. ZO-1 showed a pattern of distribution  
144 that overlapped with that of Cx43 (Pearson coefficient =  $0.72 \pm 0.20$ ).

145

## 146 **Integration within Cx43 GJ plaques requires specific connexin domains**

147           The overlapping distribution of Cx43 within gap junction plaques with Cx30, Ocln and the  
148 scaffolding protein ZO-1 raised the issue of whether the infiltration of the plaque was affected by  
149 structural rigidity of Cx43 within the plaque. To test this, we compared their normal distribution  
150 with that obtained in cells expressing highly fluid Cx43 plaques. The constructs we used  
151 deleted a large portion of the cytoplasmic tail of Cx43 or substituted three cysteine residues in  
152 this region with alanine; we previously showed that Cx43 is stabilized within the plaque by  
153 cysteine residues within its carboxyl terminus and that these mutations fluidize arrangement of  
154 channels with gap junction plaques made up of Cx43<sup>6</sup>.

155           ZO-1 associates with wild type Cx43 plaques (Figs 2A, 3A), but the association is  
156 variable, sometimes localizing at higher concentration near the perimeter of gap junction  
157 plaques. A similar, variable pattern of ZO-1 distribution is seen in plaques of fluid Cx43  
158 (cysteine-substituted; BCx43cyslessCT) (Figure 3C). By contrast ZO-1 was not detected at  
159 plaques formed of truncated Cx43 (BCx43t258 in Figure 3B), although faint EGFP-ZO-1 signal  
160 was present outside of the Cx43 plaque area.

161           Interaction of Ocln with Cx43 also depended on the presence of the Cx43 carboxyl-  
162 terminus (Figure 3D-F). We found that EBFP2-Cx43 co-expression with mEmerald-Ocln (Figure  
163 3D) generally led to strong concentration of Ocln specifically to the gap junction plaque, with  
164 some variability between cells and between plaques within the same cell. This attraction to the  
165 gap junction plaque was reversed (Ocln signal was less at the gap junction plaque than  
166 surrounding membrane) when truncated or carboxyl-terminus tagged Cx43 was expressed in  
167 conjunction with tagged Ocln (Figure 3E). Ocln association to the GJ plaque had the same  
168 requirements for the Cx43 carboxyl-terminus as ZO-1, suggesting that the PDZ binding site  
169 within the Cx43 cytoplasmic tail is required for colocalization of Ocln into the gap junction  
170 plaque.

171           Although there are Cx43-based gap junctions connecting astrocyte cellular processes  
172 throughout the parenchyma, Cx43 and AQP4 localization is concentrated to the perivascular  
173 astrocyte endfeet. This arrangement allowed us to examine distribution of the two proteins *in*  
174 *situ* using Stochastic Optical Reconstruction Microscopy (STORM) in fixed rat brain tissue  
175 sections and immunofluorescence staining (Figure 4). In this example image there is a striking  
176 lack of overlap between Cx43 and AQP4 staining around a transected brain blood vessel.  
177 These representative example data indicate that, at least in the case of AQP4, the findings of

178 gap junction effects on protein localization identified in cell culture likely reflect the *in situ*  
179 condition.

180 The fluorescent molecules examined here showed various patterns of distribution  
181 relative to the gap junction plaque and within the non-junctional membrane areas of the cells.  
182 We used Fluorescent Recovery After Photobleaching (FRAP) to determine their mobilities in  
183 non-junctional membranes and to compare their mobilities in stable vs fluid gap junction  
184 plaques. The fluorescent tag-labeled molecules each had differing levels of signal intensity  
185 within the non-junctional membrane due to several factors including fluorescent tag color,  
186 expression level of tagged proteins, and differential trafficking, cellular localization, and  
187 molecular clustering. Therefore, we present the FRAP data on plasma membrane over the  
188 same time-scale and photobleach area to allow rough comparison of mobility in non-junctional  
189 membrane with the caveat that numerous other parameters are likely not precisely matched  
190 between molecular species.

### 191 ***Non-plaque Mobility***

192 As shown in Figure 5, the rate of fluorescent recovery and percent recovery at 15 s post  
193 photobleach were markedly different between molecule types. Comparison of percent recovery  
194 at 15 s post bleach can be made to non-junctional msfGFP-Cx43 (likely existing as unpaired  
195 connexons, aka hemichannels, in a format of hexameric, 4-pass integral membrane proteins).

#### 196 **a) The plaque-excluded proteins AQP4 and EAAT2b have low non-plaque membrane** 197 **diffusivity.**

198 Both AQP4 and the glutamate transporter EAAT2b were mostly excluded from gap  
199 junction plaques (Figure 2). FRAP experiments revealed that mobility of these proteins in non-  
200 junctional membrane was very low, and similar to that of wild type Cx43 outside of GJ plaques  
201 (Figure 5A), with neither of these proteins or unpaired Cx43 recovering more than about 20%  
202 within 30 sec after bleaching. Membrane effective diffusion coefficients for these molecules  
203 were  $0.06 \pm 0.05 \mu\text{m}^2/\text{s}$  for EAAT2b,  $0.18 \pm 0.1 \mu\text{m}^2/\text{s}$  for AQP4, and  $0.24 \pm 0.06 \mu\text{m}^2/\text{s}$  for unpaired  
204 Cx43 (Table 1, n=3).

#### 205 **b) Membrane tethered fluorophores and membrane associated proteins are mobile** 206 **outside of GJ plaques.**

207 The lipid CC2-DMPE and membrane tethered palmitoylated GFP located in non-  
208 junctional areas showed very rapid recovery from photobleach, with more than 50% recovery  
209 within 15 sec (54.9±20.3% for CC2-DMPE and 60.1±9.0% for plmtGFP: Fig 5B). By contrast,  
210 recovery was much slower for b5Ext, with only 26.4±6.8% recovery at 15 s post-bleach.  
211 Calculated effective diffusion coefficients were 4.84±2.58, 4.38±1.05 and 3.17±0.69  $\mu\text{m}^2/\text{s}$  for  
212 plmtGFP, CC2-DMPE and b4Ext, respectively (Table 1, n≥3).

### 213 **c) Junctional proteins are mobile in the non-plaque region of the cell**

214 Cx30, Ocln and ZO-1 co-mingle with Cx43 in gap junctions (Figure 2), and each was  
215 found to exhibit mobilities in the plasma membrane that were nearly as fast as those of the  
216 tagged phospholipid and the membrane embedded small molecules that we examined.  
217 Repopulation of the bleached area was greater than 35% complete within 15 s of each of these  
218 proteins; 35.7±14.7% for Cx30, 42.0±20.4% for Ocln, and 54.9±19.6% for ZO-1 (Figure 5C).  
219 Membrane effective diffusion coefficients were 1.43±0.35, 2.11±0.55 and 1.49±0.31  $\mu\text{m}^2/\text{s}$  for  
220 Cx30, Ocln and ZO-1 respectively (Table 1, n=3).

### 221 ***Intraplaque Mobility***

222 The colocalization experiments indicated a variety of overlap patterns between Cx43 and  
223 each of the different types of nexus components (Figure 1 and 2), as would be expected from  
224 binding to other proteins (membrane-embedded and cytoplasmic) and crowding within the  
225 highly ordered plaque. In order to investigate dynamics of these interactions we evaluated  
226 mobilities of those proteins in wild type and fluidized Cx43 plaques using two color FRAP  
227 experiments.

### 228 **a) Lipids and small integral membrane proteins are mobile within Cx43 GJ plaques**

229 Due to differences in fluorescent signal density, photobleach region size, and  
230 photobleaching rate, comparisons of non-plaque and intraplaque mobility are not useful.  
231 However, the ability to modulate plaque stability by truncation or mutation allowed comparison  
232 of mobilities of the small lipophilic molecules in stable vs fluid plaque domains, revealing both  
233 similarities and distinctions (Fig. 6). The voltage sensitive membrane dye CCM2-DMPE  
234 exhibited very rapid recovery of about 50% of the bleached region within 15 sec, and this  
235 recovery was similar in stable (52.3±7.2%) and unstable (70.3±4.4%) GJ plaques (Fig 6A).  
236 Rates of recovery for CCM2-DMPE yielded effective diffusion coefficients of 4.45±1.4 and  
237 3.48±0.68  $\mu\text{m}^2/\text{s}$  in stable and unstable plaques, which were not different from the non-



238 junctional diffusion rate of  $4.38 \pm 1.05 \mu\text{m}^2/\text{s}$  (Table 1,  $n=3$ ). Green Fluorescent Protein tethered  
239 to the membrane by palmitoylation also showed rapid recovery in both fluid and non-fluid  
240 plaques (Fig 6B). Recovery exceeded 60% within 15 sec ( $63.2 \pm 3.8\%$  in non-fluid plaques and  
241  $71.6 \pm 4.2\%$  in fluid plaques), and membrane effective diffusion coefficients were  $5.17 \pm 0.63$  and  
242  $4.54 \pm 2.9 \mu\text{m}^2/\text{s}$  in non-fluid and fluid junctions, respectively, not different from rate in non-  
243 junctional membrane of  $4.84 \pm 2.58 \mu\text{m}^2/\text{s}$  (Table 1,  $n=3$ ). The third lipophilic probe examined,  
244 b5Ext, also showed similarly rapid recovery of more than 40-50% within 15 sec ( $46.2 \pm 4.6\%$  for  
245 WT and  $57.7 \pm 6.6\%$  for fluid plaques), with molecular diffusion coefficients of  $3.02 \pm 0.52$  and  
246  $2.03 \pm 0.95 \mu\text{m}^2/\text{s}$  in WT and fluidized Cx43 plaques (Table 1,  $n=3$ ). The extent of recovery was  
247 very similar to that in nonplaque domains for this molecule ( $3.17 \pm 0.69 \mu\text{m}^2/\text{s}$ ).

### 248 **b) Behavior of junction-associated proteins in fluid and non-fluid GJ plaques**

249 Both Cx30 and OcIn localize to the junctional membrane area occupied by gap junction  
250 plaques, ZO-1 is also located at GJ plaques (Figure 2), and we found that mobility of each of  
251 these proteins was relatively high in the non-junctional membrane (Fig 5C). Mobility of Cx30  
252 within GJ plaques was higher and recovery was more complete in fluid than non-fluid (WT  
253 carboxyl-terminus) plaques. Recovery at 30 s post-bleach was  $33.7 \pm 6.2\%$  in WT plaques and  
254  $69.4 \pm 7.0\%$  in fluidized plaques; diffusion coefficients were  $0.78 \pm 0.36 \mu\text{m}^2/\text{s}$  in WT vs  $1.85 \pm$   
255  $1.35 \mu\text{m}^2/\text{s}$  in fluid plaques (Figure 7A).

256 We demonstrated that OcIn concentrates to Cx43 gap junction plaques but is excluded  
257 from plaques in which the Cx43 carboxyl terminus is deleted (Figure 3). FRAP experiments  
258 revealed that OcIn was much less mobile in normal Cx43 plaques than in fluid plaques, with  
259 recovery at 30 s post-bleach being  $28.4 \pm 7.3\%$  for WT plaques and  $44.1 \pm 6.7\%$  for cyslessCT  
260 (fluid) plaques. Effective diffusion coefficient in the non-fluid plaques was  $0.81 \pm 0.63 \mu\text{m}^2/\text{s}$ ,  
261 whereas mobility in fluid plaques ( $2.51 \pm 0.92 \mu\text{m}^2/\text{s}$ ) was similar to that in non-junctional  
262 regions ( $2.11 \pm 0.55 \mu\text{m}^2/\text{s}$ , Figure 7B).

263 ZO-1 was found both at the edge of GJ plaques and also in a patchy distribution across  
264 the interior regions of wild type Cx43 gap junction plaques, but it was not localized to plaques  
265 made of truncated Cx43 (Figures 2 and 3). In photobleach experiments, ZO-1 recovered  
266 substantially less when in non-fluid junctions ( $31.7 \pm 6.1\%$ ) than in non-junctional membrane and  
267 effective diffusion coefficient was about 5 times slower ( $0.33 \pm 0.04 \mu\text{m}^2/\text{s}$  inside the plaque vs  
268  $1.49 \pm 0.31 \mu\text{m}^2/\text{s}$  outside). The diffusion coefficient of ZO-1 in cyslessCT (fluid) Cx43 plaques

269 (0.44 ± 0.62 μm<sup>2</sup>/s was similar to that observed in non-fluid plaques with a trend toward  
270 increased mobility in the cysteine-mutant fluid plaques as shown in Figure 7C.

271

## 272 **Discussion**

273 The highly-packed, two-dimensional array of connexons observed by freeze fracture and  
274 immunofluorescence of gap junction plaques does not reflect the many cytoplasmic and  
275 membrane proteins or lipophilic molecules that comprise the environment of the gap junction  
276 Nexus. Gap junction plaques made up of Cx43 with fluorescent protein tags have been  
277 observed bending, splitting, and joining with other gap junctions in live cells<sup>14</sup>. Additionally,  
278 density of connexins throughout the plaque may be nonuniform, with connexin-free  
279 discontinuities often observed to exist and move within stably arranged gap junctions<sup>15</sup>. Clearly,  
280 the apparent 2D crystalline array of intramembrane proteins belies the dynamic structure of the  
281 GJ plaque, where Nexus components bind and unbind to one another and diffuse within the  
282 plaque.

283 In this study we examined distribution of Nexus components relative to that of Cx43 in  
284 plaques in live cells using fluorescence recovery after photobleaching (FRAP) to determine  
285 diffusional mobilities of the molecules both within Cx43 plaques and in non-junctional domains.  
286 In addition, distribution and mobilities were compared in fluidized Cx43 plaques, where  
287 mutagenesis of cytoplasm-localized cysteine residues or truncation of the carboxyl terminus  
288 transforms the ordinarily rigid plaque into one which exhibited much more rapid and extensive  
289 FRAP recovery<sup>4,6</sup>. Molecules examined included three small lipophilic markers, (a fluorescent  
290 phospholipid that has been used to detect voltage changes in membranes (CC2-DPME)<sup>16</sup>, GFP  
291 anchored to the membrane through palmitoylation, and b5Ext, a plasma membrane targeted  
292 fragment of cytochrome-b5 which has been used as a tool for studying membrane transport and  
293 endoplasmic reticulum<sup>17,18</sup>, two proteins forming pathways for exchange of molecules across the  
294 cell membrane (the water channel protein AQP4 and the glutamate transporter EAAT2b), and  
295 three components of cell junctions,(the gap junction protein Cx30, the tight junction protein  
296 Occludin (Ocln), and the scaffolding molecule zonula occludens (ZO-1), which binds to integral  
297 proteins of both tight and gap junctions).

298 Previous studies examined lipophilic dye movement through gap junction plaque-  
299 occupied membrane and found a high degree of mobility<sup>19</sup>. The lipophilic markers used in the

300 present study were also highly mobile in non-junctional membrane and in both WT (stable) and  
301 cysless (fluid) Cx43 plaques. The lipophilic dye CC2-DMPE density varied only slightly across  
302 the plaque as was reported previously by others for the lipophilic DiI (1,1'-Dioctadecyl-3,3',3'-  
303 Tetramethylindocarbocyanine Perchlorate)<sup>19</sup>. In contrast to CC2-DMPE, the other two  
304 membrane associated proteins we examined showed partial exclusion. We attribute the  
305 apparent exclusion as reflecting variation in lipid abundance between the general non-junctional  
306 membrane and the densely packed plaque<sup>20</sup>. With respect to mobility, the lipophilic molecules  
307 showed high non-junctional effective diffusion coefficients and mobility within the fluid plaque  
308 that were quite similar to that in non-fluid plaques.

309 Two transmembrane proteins, water channel AQP4 and glutamate transporter EAAT2b,  
310 were excluded from junctional plaques formed by both WT and cysless Cx43. Interestingly,  
311 AQP4 abundance consistently appeared higher in the region adjacent to the plaque than  
312 elsewhere (the “perinexus”<sup>21</sup>) as shown in example line-scans and averaged line-scans in  
313 Figure 2 and in STORM experiments illustrated in Figure 4. Lateral mobility of these proteins in  
314 the membrane outside the plaque was about ten-fold lower than for other membrane proteins of  
315 similar size examined (Cx30 and OcIn). Previous studies have also reported low membrane  
316 mobility of AQP4 and EAAT2b and have speculated that stabilized AQP4 assembly into  
317 orthogonal particle arrays (OAPs) anchored by syntrophin may provide a mechanism for  
318 polarized water flux at astrocyte endfeet<sup>22</sup>, and that binding of EAAT2b to PDZ domain  
319 containing scaffolding molecules may optimize local glutamate uptake by astrocytes near  
320 synapses<sup>23</sup>.

321 The gap junction protein Cx30 and the tight junction-associated proteins OcIn and ZO-1  
322 behaved differently than AQP4 and EAAT1b. All exhibited penetration within the junctional  
323 plaques, although abundance of Cx30 increased while ZO-1 was only minimally present in  
324 plaques formed by the truncation mutant. All displayed high mobility in regions outside the  
325 plaque, with diffusion coefficients on the same order of magnitude as those of the small  
326 lipophilic markers. Each had significantly decreased mobility within non-fluid plaques made up  
327 of Cx43 with wild-type carboxyl terminus. Mobility for Cx30 and OcIn was found to be higher in  
328 fluid than in non-fluid Cx43 plaques.

329 OcIn was the first ZO-1 binding partner identified, and the two proteins bind to one  
330 another to form a major component of tight junctions<sup>24</sup>. OcIn has previously been found to  
331 localize to gap junctions<sup>25,26</sup>. We found that EBFP2-Cx43 or msfGFP-Cx43 co-expression with

332 Ocln-mEmerald led to strong concentration of Ocln specifically to the gap junction plaque  
333 (Figure 2). This apparent attraction to the gap junction plaque was reversed (Ocln was partially  
334 excluded from GJ plaque) when truncated or a carboxyl-terminus tagged Cx43 was expressed  
335 with tagged Ocln (Figure 3), indicating that the PDZ binding site at the CT of Cx43 (the location  
336 where ZO-1 interacts)<sup>27</sup> may be required for Cx43-induced localization of Ocln into GJ plaques.  
337 Cx43 has previously been shown to modulate tight junction formation<sup>28</sup> and this interaction with  
338 scaffold protein ZO-1 and Ocln may be one mechanism by which Cx43 promotes tight junctions,  
339 acting as a site for molecular aggregation and/or assembly.

340 In some conditions Cx43 GJ plaques are present in the basolateral membrane of  
341 epithelial cells where they are adjacent to (and sometimes intermingled with) tight and adherens  
342 junctions<sup>28-30</sup>. We tested if gap junction plaque stability affected the localization and mobility of  
343 tight junction proteins. Cx43 binds ZO-1 through interaction between amino acids at the end of  
344 the carboxyl-terminus of Cx43 and the PDZ-2 binding domain of ZO-1<sup>11,12,31,32</sup>. Cx43 with a  
345 fluorescent tag appended to the carboxyl-terminus is unable to interact normally so we used our  
346 EBFP2-Cx43 construct with its free carboxyl-terminus to visualize the localization of Cx43 and  
347 ZO-1 in live cells<sup>11,33</sup>. We found that while ZO-1 associates in the highest concentration at the  
348 edge of Cx43 gap junction plaques, as has been previously described<sup>34</sup>. ZO-1 was also  
349 reproducibly localized in a patchy distribution across the interior regions of wild type Cx43 gap  
350 junction plaques, but not localized to plaques made of truncated Cx43 (Figures 2 and 3). This  
351 could be, in part, an artifact of the overexpression of Cx43 and ZO-1 but indicates that ZO-1  
352 binding is not strictly limited to the perimeter of the gap junctions. Notably, mEGFP-hZO-1 was  
353 found to be mobile at stably arranged gap junctions (Figure 7). Because ZO-1 is a cytosolic  
354 protein, photobleach recovery might occur from unbound unbleached protein in the vicinity of  
355 the bleach or from unbleached protein released from the prior location and rebound within the  
356 bleached region. We observed that recovery often proceeded from the edge of the bleach  
357 region toward the center of the bleach area as shown in Figure 5. This indicates that a large  
358 portion of the pool of unbleached mEGFP-hZO-1 that participated in photobleach recovery was  
359 from unbinding and re-localization of ZO-1 from bleach-adjacent parts of the GJ plaque. The  
360 preferential but incomplete localization of ZO-1 to the edge of gap junctions may be dependent  
361 on posttranslational modifications such as phosphorylation of Cx43 or could indicate competition  
362 with ZO-1 binding proteins<sup>35,36</sup>; actin and other junction proteins are likely candidates for such a  
363 factor promoting enhanced localization of ZO-1 to the edge of the plaque structure.

364 This distributed localization of ZO-1 allowed us to perform high-resolution FRAP  
365 experiments on ZO-1 localized to the gap junction nexus for the first time with the surprising  
366 result of relatively high mobility for ZO-1 (Effective Diffusion Coefficient  $0.33 \pm 0.04 \mu^2/s$ , Table 1)  
367 on the intracellular surfaces of stably arranged Cx43 gap junctions. The amount and localization  
368 of ZO-1 and OcIn are dynamically altered and affect rate and degree of tight junction  
369 degradation and reformation, processes critical to diseases of barrier dysfunction at the  
370 interface between blood and brain, liver, kidney, and tumor (among others). The ability of Cx43  
371 to concentrate or retain the tight junction protein OcIn at gap junctions has been observed  
372 previously<sup>37</sup> but we now show that OcIn clustering into gap junction plaques depends on the  
373 carboxyl-terminus of Cx43 (Figure 2 and 3). The Cx43 gap junction Nexus may therefore form a  
374 platform for the assembly and retention of scaffolds and other junctional proteins. A previous  
375 study found that application of inflammatory cytokines to human astrocytes in culture modulated  
376 expression of claudins and tight junction proteins<sup>38</sup>. This raises the interesting question of  
377 whether Cx43 localization of ZO-1 and OcIn is modified by inflammatory cytokines as a potential  
378 alternative mechanism of tight-junction protein availability in astrocyte endfeet.

379 Although they are not necessary for the formation of gap junction plaques (channel  
380 clustering) cysteine residues within the Cx43 carboxyl-terminus act as tethers which hold  
381 clustered gap junctions in a stable arrangement. Connexin-free zones which appear as holes in  
382 gap junction plaque are generated when part of the gap junction is endocytosed<sup>39</sup>. The  
383 composition of these connexin-free zones is unknown, but they can migrate within an otherwise  
384 stable gap as described previously<sup>40</sup>. This movement of lipids and integral membrane proteins is  
385 perplexing in the context of a stably arranged gap junction but might be explained by weak and  
386 transient but extremely locally-abundant interactions as would be expected in the highly  
387 crowded and spatially ordered gap junction plaque. In the case of the CT of Cx43 gap junction  
388 channels, thirty-six cysteine residues (in total with paired- or “docked”- hexamers each  
389 containing 3 cytoplasmic cysteines) are positioned very close to cysteines on twelve  
390 immediately adjacent Cx43 gap junction channels. Additionally, the movement of the cysteines  
391 within the CT are restricted by the transmembrane domains and, likely, steric crowding by CT of  
392 adjacent Cx43 hexamers. Our results indicate that the anchoring behavior of the Cx43 CT  
393 restricts the mobility of other gap junction nexus components separately from the localization of  
394 these proteins to the gap junction plaque (which is dependent on a distinct sequence in the  
395 Cx43 CT downstream from the “Anchoring Domain” created by the three cysteine residues).

396 Cx43 and Cx30 gap junction plaques within the brain are localized to specialized  
397 astrocyte membrane extensions called endfeet where they cluster prominently around blood  
398 vessels and are also non-randomly localized to peri-synaptic astrocyte processes<sup>41-43</sup>. Cx43  
399 does not pair with Cx30 to form heterotypic junctions<sup>44</sup>, although it can form GJ plaques with  
400 intermingled channels in some conditions and cell types<sup>4,41</sup>. Cx43 and Cx30 are expressed in  
401 astrocytes where knockout studies indicate a complex but connexin-specific relationship to  
402 astrocyte- and by extension- brain function. Disruption of the gene for Cx43 alone or in  
403 combination with Cx30 had an opposite effect on synaptic signaling amplitude as Cx30 deletion,  
404 and the effect of Cx30 deletion was found to be channel-function independent<sup>45</sup>. Cx43 and Cx30  
405 at astrocyte perivascular endfeet are required for normal blood-brain barrier strength or  
406 maintenance<sup>46</sup>. Along with extreme differences in the stability of the gap junction plaques that  
407 Cx30 forms, Cx30 also has a very different protein half-life, channel properties, and connexon  
408 assembly pathway within the cell compared with Cx43. It is possible that the effects Cx43 has  
409 on Cx30 arrangement within gap junctions could tune the parameters of half-life and channel  
410 open/closure depending on the tissue type (i.e. if the cells making up the tissue express only  
411 Cx30 or both Cx43 and Cx30).

412 Altogether, we report several new aspects of the gap junction Nexus supramolecular  
413 complex and that these new characteristics influence each other in surprising ways. Gap  
414 junction plaque arrangement stability lowers mobility of the transmembrane proteins we tested  
415 (Cx30 and Oc1n) that intermingle into both stably and unstably arranged gap junctions. The  
416 cytoplasmic tight junction associated protein ZO-1 is known to interact with the CT and here we  
417 show that, surprisingly, fluorescent protein tagged ZO-1 is mobile when localized to stably  
418 arranged gap junction plaques. Lipid dyes were previously found to be mobile within stably  
419 arranged gap junction plaques<sup>19</sup>. We extend these findings to show that that a synthetic dye-  
420 conjugated lipid, membrane tethered GFP, and a GFP-tagged single pass transmembrane  
421 protein are highly mobile within stable gap junction plaques. These results contribute  
422 substantially to our understanding of how the gap junction nexus is dynamically configured in  
423 live cells. Cx43 is co-expressed with Cx30 in astrocytes where the two proteins seem to have  
424 only partially overlapping roles in controlling intercellular communication and cell morphology.  
425 The role of cytoplasmic-localized cysteine residues in gap junction plaque stability, the effect of  
426 an antioxidant on gap junction plaque fluidity, and the interaction between Cx43 stability and  
427 other nexus components will be critical to further investigations to understand how gap junctions  
428 control cell/tissue morphology and physiology.

429

## 430 **Materials and Methods**

431 **Plasmids and fluorescent probes:** sfGFP-Cx43, sfGFP-Cx43t258, sfGFP-Cx30, Cx30-  
432 msfGFP, EBFP-Cx43, EBFP-Cx43t258 were described previously<sup>4</sup>. sfGFP-Cx43cysICTwas  
433 described previously<sup>6</sup>.

434 The EGFP-ZO-1, Occludin-mEmerald and Occludin-mCherry expression plasmids were  
435 obtained from Addgene.com. pEGFP ZO1 was a gift from Alan Fanning (Addgene plasmid #  
436 30313)<sup>47</sup>. pCAG-mGFP (palmitoylated GFP) was a gift from Connie Cepko (Addgene plasmid #  
437 14757)<sup>48</sup>. The mCherry-Occludin-N-10, mEmerald-Occludin-N-10, and mCherry-Cx43-N-7 were  
438 gifts from Michael Davidson (Addgene plasmids # 55112, # 54212 and # 55023, respectively).  
439 EAAT2a-EGFP and EAAT2b-EGFP<sup>49</sup> were gifts from Susan Amara, NIMH, Bethesda MD. The  
440 b5Extended-mGFP construct was a gift from Erik Snapp, Janelia Research Campus, Ashburn  
441 VA, and was originally described by Bulbarelli and colleagues<sup>50</sup>. The coumarin labeled  
442 phospholipid CC2-DMPE was a gift from Ted Bargiello, Albert Einstein College of Medicine,  
443 Bronx, NY.

444 **Cell culture and transfection:** Neuro2a (N2A) and HeLa cells were maintained in DMEM  
445 medium (Glucose 4.5 g/L) supplemented with 10% FBS and 1% Penicillin/Streptomycin. For  
446 standard FRAP experiments N2A and HeLa cells were plated into 8-well imaging chambers  
447 (iBidi, cat no. 80826 or In Vitro Scientific, C8-1.5H-N) and each well was transfected with 0.5 µg  
448 of each plasmid to drive expression of Connexin-fluorescent protein fusions 24-72 h prior to  
449 imaging. Cells were transfected at ~80% confluency. Optifect (Life Technologies) was used as  
450 the transfection reagent according to manufacturer's instructions adjusted for the surface area of  
451 the wells of the iBidi chambers (50 µl of Opti-MEM media and 3 µl of Optifect reagent per well).  
452 Opti-MEM media was replaced with the standard growth media for HeLa and N2A cells (DMEM  
453 with 10% fetal bovine serum and 1% Penicillin-Streptomycin 6-16 h after transfection. For  
454 experiments with co-expression of multiple proteins from separate plasmids (e.g. EBFP2-Cx43  
455 + Cx30-msfGFP), the plasmids were mixed 1:1 prior to addition to the Opti-MEM-Optifect  
456 transfection mixture. Cells were incubated in standard growth media for at least 4 h prior to  
457 imaging. For non-plaque FRAP experiments transfection was formed using TransIT-LT1 (Mirus,  
458 LLC, Madison, WI) per manufacturer's protocol. 2 µg of DNA, 100 µL of Opti-MEM, and 5 µL per

459 3.5 mm dish were mixed and incubated at room temperature for 30 min and added dropwise to  
460 HeLa cell cultures. Experiments were performed at 24-72 h post-transfection.

461 **Confocal microscopy and line-scans:** 2D confocal micrographs were obtained with the Zeiss  
462 LSM 510 Live with Duo module with 63x NA=1.4 oil immersion objective. Images were  
463 512x1024 or 1024x1024 pixels. An imaging plane was selected with a view of the gap junction  
464 plaque orthogonal to the cell membrane, such that plaques appeared as linear elements. Single  
465 frame images were taken and analyzed for molecular distribution as quantified by fluorescence  
466 intensity. Line scans over entire Cx43 plaques, starting approximately 1-2  $\mu\text{m}$  outside of the  
467 plaque, were obtained using ImageJ (NIH), by tracing plaque contours with the line tool and  
468 measuring intensity profile. Pearson correlations were calculated for each Cx43-plaque  
469 associated molecule pair<sup>51</sup>.

470 **Two-color Stochastic Optical Reconstruction Microscopy (STORM):** Brain of adult rats  
471 were extracted immediately after the rats died and placed in 4% Paraformaldehyde in PBS for  
472 48 hours at 4<sup>o</sup>C. The brains were transferred to 30% sucrose for 96 hours at 4<sup>o</sup>C then frozen into  
473 Optimal Cryosectioning Tissue gel and cryosectioned to 15  $\mu\text{m}$  in the coronal orientation  
474 through the forebrain in the area including the hippocampus. Sections were placed free-floating  
475 in PBS and immediately put through the immunostaining procedure. Immunostaining was  
476 performed by first blocking in permeabilizing blocking buffer and background suppression buffer  
477 from Biotium (TrueBlack® IF Background Suppressor System 1:100 dilution in PBS, Cat no.  
478 #23012-T). Primary antibodies were polyclonal Goat anti-AQP4 (Cat. No. sc-9888, Santa Cruz  
479 Biotechnology) and rabbit anti-Cx43 (Cat. No. C6219, Sigma Aldrich). Primary antibodies were  
480 diluted to 1:500 in blocking buffer, sections were incubated with agitation for 3 hours at room  
481 temperature followed by 24 hours at 4<sup>o</sup>C, followed by 3 hours at room temperature. Sections  
482 were washed in PBS once then transferred to secondary antibody at 1:500 dilution in blocking  
483 buffer for 3 hours at room temperature with agitation. Sections were washed in PBS for 5  
484 minutes at room temperature with agitation 3 times, then post-fixed in 2% PFA for 10 minutes,  
485 washed once in PBS then stored until imaging (1-2 days).

486 Imaging was performed on the Nanoimager S (Oxford Nanolmaging, ONI, Oxford, UK).  
487 Sections were mounted onto coverslips in PBS then a drop of BCubed STORM buffer (ONI)  
488 was placed onto the section followed by overlay of a #1.5 coverslip and the coverslip sealed  
489 with clear fingernail polish. The sections were imaged using the 100X 1.41NA Olympus  
490 objective on the Nanoimager at 37<sup>o</sup>C at 100% laser power onto the dual-color channel sCMOS



491 camera. Localizations image display was performed in the NimOS v1.3 software. The signal  
492 from the Alexa Fluor 555 and 647 was acquired with 100 percent laser power simultaneously for  
493 20,000 frames. Localizations were shown by the “Precision” method which makes displayed  
494 spot size and blur depend on localization precision.

495

496 **FRAP:** 2D time-lapse imaging was conducted as described previously<sup>4</sup>, and<sup>52</sup>. Cells were  
497 maintained at 37°C on the stage of a Zeiss LSM 510 Live with Duo module and imaged with a  
498 63X NA=1.4 oil immersion objective. The detector consists of dual 512 pixel linear arrays of  
499 CCD camera-type pixels. Gap junctions aligned in a nearly perpendicular plane with respect to  
500 the growth substrate were used for 2D time-lapse FRAP. A 5 pixel (1  $\mu\text{m}$  wide) stripe bleach  
501 region was set to bleach a horizontal stripe across each gap junction plaque. Bleach settings  
502 were 100% laser transmission at a scan speed of 5 with 3 bleach iterations. Lower bleach laser  
503 power and single bleach iterations were tested to generate greatly reduced photobleaching. No  
504 recovery of Cx43 into the bleach region (no detectable rearrangement of GJ channels) was  
505 observed in FRAP experiments with the lowest degree of bleaching. This indicates that  
506 photobleach induced oxidation is not the cause of Cx43 stability.

507 **Time-lapse FRAP:** Experiments in which only GFP was bleached use the same procedure as  
508 normal 2D time-lapse FRAP with 1 s acquisition intervals instead of 0.5s intervals but with  
509 sequential excitation-detection scanning with the GFP (green) channel and then the EBFB2  
510 (blue channel, shown as red in all figures for visibility) as described<sup>52</sup>. FRAP recovery data for  
511 the blue and green channels were extracted separately as described below. Laser power and  
512 detector gain sometimes needed to be adjusted within samples of the same group.

513 **FRAP data analysis:** Average fluorescence within the bleach region, for the entire GJ plaque to  
514 be bleached (Fluorescence pool available for recovery, Fp), and a portion of the background in  
515 a location with no GFP expression were outlined to generate 3 Regions Of Interest (ROI).  
516 Recovery curves were transformed to correct for loss of signal due to bleach and for acquisition-  
517 bleach of the total pool of fluorescent protein and normalized to 100% pre-bleach and 0% for the  
518 initial post-bleach time-point to normalize for incomplete bleaching within the bleach ROI as  
519 previously described<sup>53</sup>. A correction factor (cf) was calculated by dividing the average of the 10  
520 fluorescence pool readings preceding the bleach (initial fluorescence of the fluorescence pool;  
521 fpFo) by the fluorescent pool ROI readings at each time point (Fp), (fpFo/Fp). The bleach ROI  
522 reading (bF) for each time point was divided by the bleach region baseline-initial fluorescence

523 Fo (bFo), (bF/bFo) and the resulting fraction of initial fluorescence was then multiplied by the  
524 correction factor. The resulting corrected fractional fluorescence was then multiplied by 100% to  
525 calculate “normalized recovery (%)” With omission of background subtraction, transforming to  
526 complete bleach baseline, and averaging to generate initial fluorescence pool values, the  
527 calculations for the recovery curve values were as follows:

528

$$529 \text{FRAP}\% = (f_p F_o / F_p) * (bF / bF_o) * 100\%.$$

530

531 The normalized data points at 15 or 30 s after the bleach time-point were used in comparison of  
532 percent recovery at 15 or 30 s. Effective diffusion coefficient was estimated using the  
533 ImageJ/FIJI FRAP plugin “simFRAP” which fits the data to a simulated diffusion<sup>54-56</sup>. In brief,  
534 simFRAP loads image data into a 2D diffusion simulation with user-defined ROIs: a bleach  
535 region, bleached cell region (recovery pool), and reference cell region. We followed the supplied  
536 protocol with modification of ROI selection to adjust for the shape of gap junction plaques. We  
537 used the bleached region of the plaque as the bleached ROI, but used 2  $\mu\text{m}$  of the plaque on  
538 either side of the bleach region as recovery pool ROI, and a 2  $\mu\text{m}$  section of the plaque distal  
539 from the bleach region (or a separate gap junction plaque) as the reference cell ROI.

540 Simulations were run for 10000 iterations. Diffusion coefficient was fitted by the equation  
541  $D_{\text{cal}} = L^2 / 4 \tau_i$  where  $D_{\text{cal}}$  is the calculated diffusion coefficient L is pixel size in  $\mu\text{m}$  and  $\tau_i$  is the  
542 duration of one iteration in seconds.

543

544 **Statistics:** For comparison of 2 groups we used a student’s t-test. When comparing 3 or more  
545 groups we used a one-way ANOVA with pair-wise post-hoc Tukey Tests. Significance between  
546 groups was defined as  $p < 0.05$ . Statistical analysis was performed using GraphPad Prism 7.03  
547 for Windows (GraphPad Software, La Jolla California USA).

548

|          | Diffusion Coefficient ( $\mu\text{m}^2/\text{s}$ ) |                   |                   |
|----------|----------------------------------------------------|-------------------|-------------------|
|          | Non-plaque                                         | Stable Plaque     | Mobile Plaque     |
| Cx43     | $0.24 \pm 0.05^a$                                  | $0.03 \pm 0.01$   | $0.44 \pm 0.19^a$ |
| AQP4     | $0.18 \pm 0.10$                                    | n/a               | n/a               |
| EAAT2b   | $0.06 \pm 0.05$                                    | n/a               | n/a               |
| CC2-DMPE | $4.38 \pm 1.05^a$                                  | $4.45 \pm 1.40^a$ | $3.48 \pm 0.68^a$ |
| plmtGFP  | $4.84 \pm 2.58^a$                                  | $5.17 \pm 0.63^a$ | $4.54 \pm 2.90$   |
| b5Ext    | $3.17 \pm 0.69^a$                                  | $3.02 \pm 0.52^a$ | $2.03 \pm 0.95$   |
| Cx30     | $1.43 \pm 0.35^a$                                  | $0.78 \pm 0.36$   | $1.85 \pm 1.35$   |
| Occludin | $2.11 \pm 0.55^a$                                  | $0.81 \pm 0.63$   | $2.51 \pm 0.92$   |
| ZO-1     | $1.49 \pm 0.31^a$                                  | $0.33 \pm 0.04^a$ | $0.44 \pm 0.62$   |

549

550 **Table 1:** Diffusion coefficients calculated as defined in methods for each of the molecules  
551 studied in this report. Data presented as mean  $\pm$  standard deviation.  $n \geq 3$ .  $^a p < 0.05$  vs Cx43  
552 wild-type (stable) plaque.

553 **Figure 1.** Gap junction plaques modify localization of membrane-bound molecules. **A)**  
554 Fluorescence micrographs of N2A cells co-expressing fluorescently-tagged small membrane  
555 molecules with fluorophore tagged-Cx43, illustrating that phospholipid CC2-DMPE penetrates  
556 Cx43 plaques (white arrows) and has an unaltered distribution vs the non-plaque region.  
557 Individual channels are shown below the overlay images. For panels in "A" msfGFP-Cx43 is  
558 pseudocolored red for consistency with EBFP2-Cx43 which is red pseudocolored throughout  
559 the following figures. Line-scans spanning the entire plaque for the two channels are shown  
560 below the example images. **B)** membrane-tethered GFP and **C)** transmembrane protein b5Ext  
561 penetrate the plaque but have a lower density than in non-plaque regions. **D)** Average line  
562 scans of relative fluorescence intensity for fluorophore-tagged molecules at the edge of Cx43  
563 plaques.  $n \geq 4$  **E)** Pearson correlation, or tendency to intermingle with Cx43 at the plaque.  
564 Magenta arrows in B, C indicate void spaces in the Cx43 plaque.

565 **Figure 2.** Integration or exclusion of membrane proteins from gap junction plaques. **A)**  
566 Fluorescence micrographs of N2A cells co-expressing GFP-tagged membrane proteins and  
567 BFP-tagged Cx43 demonstrating that AQP4 and EAAT2b are excluded from Cx43 plaques,  
568 whereas Cx30, Occludin, and ZO-1 penetrate Cx43 plaques. Example line scans show  
569 fluorescence in arbitrary units over the entire Cx43 plaque and perinexus region. Arrows  
570 indicate voids in the Cx43 plaque. **B)** Average line scans of relative fluorescence intensity for  
571 respective membrane proteins and Cx43 at the edge of Cx43 plaques.  $n \geq 6$ . **C)** Respective  
572 Pearson correlation, or intermingling tendency, of membrane proteins with Cx43 within the gap  
573 junction plaque.

574 **Figure 3.** The attraction of some proteins to the gap junction plaque requires sequences in the  
575 carboxyl-terminus of Cx43. **A)** HeLa cells co-expressing EBFP2-Cx43 and EGFP-ZO1. Middle  
576 and right images show individual channels. The example line scan shows fluorescence in  
577 arbitrary units for the profile along the gap junction plaque and perinexus areas adjacent to the  
578 plaque edges. Fluorophore brightness and laser power varies greatly between the two channels

579 and the intensity profiles are scaled for the line scan to allow spatial comparison. **B)** EBFP2-  
580 Cx43t258 (truncated at AA258, also known as K258stop) produces gap junction plaques but  
581 does not localize EGFP-ZO1 to the junction. **C)** EBFP2-Cx43cysICT (C260A, C271A, C298A)  
582 also produces gap junction plaques and EGFP-ZO1 localization to the plaque. The circular  
583 structures are endocytic vesicles (connexosomes) that are also sometimes observed in cells  
584 expressing the Cx43 form shown in “A” and “B”. **D)** EBFP2-Cx43 (full-length, wild-type rat Cx43  
585 with blue tag, pseudocolored red for visibility) co-expressed with mEmerald-Occludin leads to  
586 localization of Occludin to the gap junction plaque. **E)** mEmerald-Occludin is not localized to the  
587 EBFP2-Cx43t258 gap junction plaque. **F)** EBFP2-Cx43cysICT (with carboxyl-terminus intact)  
588 leads to enhanced localization of mEmerald to the gap junction plaque.

589 **Figure 4.** Non-overlapping Cx43 and AQP4 staining in rat astrocyte endfeet is revealed by two-  
590 color STochastic Reconstruction Optical Microscopy in immunostained cryosectioned tissue.  
591 STORM localization microscopy with two color channels (Alexa Fluor 555 and Alexa Fluor 647)  
592 in fixed rat brain tissue. A) Standard resolution wide-field microscopy. Aquaporin4 (green) is  
593 expressed in astrocyte endfeet around a blood vessel in the rat cortex. Connexin43 (red) forms  
594 gap junctions that connect astrocyte endfeet. B) Slightly zoomed in STORM image of the same  
595 brain blood vessel. More Cx43 molecules are visible outside of the astrocyte endfeet due to the  
596 ability to detect single Cx43 molecules with dSTORM and antibody labeling. C) Zoomed-in view  
597 from “B” on a region where astrocyte endfoot processes meet over the vessel. D) Further  
598 zoomed-in image of “C” to show large clusters of Cx43 signal in red are likely gap junction  
599 plaques. E and F) When zoomed-in beyond resolution of standard microscopy the lack of  
600 intermingling of the red Cx43 and green AQP4 signal is evident. AQP4 only (green) channel is  
601 shown to the panel to the right of the 2-channel overlay in “E” and “F”.

602 **Figure 5.** Nonplaque mobility of membrane embedded molecules. **A)** The plaque-excluded  
603 proteins aquaporin 4 and EAAT2b have low non-plaque membrane diffusivity. **B)** Membrane  
604 tethered fluorophores and membrane associate proteins are mobile outside of the gap junction  
605 plaque. **C)** Cx30, Occludin and ZO-1 are mobile in the cell membrane outside of the plaques.  
606 Each panel includes representative bleached non-plaque regions of interest, FRAP recovery  
607 curves, and bar chart of extent of recovery at 15 s post-bleach. Data shown as average  $\pm$  SEM.

608 **Figure 6.** Lipids and small integral membrane proteins are mobile within both stable and fluid  
609 GJ plaques. **A)** The coumarin-conjugated phospholipid CC2-DMP is mobile within GJ plaques.  
610 **B)** Membrane-tethered GFP is mobile within GJ plaques. **C)** The single pass transmembrane  
611 protein b5Extended is mobile in stable GJs. Each panel includes representative bleached  
612 regions of interest, FRAP recovery curves, and bar chart of extent of recovery at 15 s post-  
613 bleach. Data shown as average  $\pm$  SEM.

614 **Figure 7.** Junction-associated proteins are mobile in Cx43 GJ plaques and mobility is higher in  
615 fluid plaques. **A)** Cx30 is mobile within GJ plaques and is more mobile in unstable GJ plaques.  
616 **B)** Occludin is mobile within GJ plaques and is more mobile in unstable GJ plaques. **C)** ZO-1 is  
617 mobile within stable GJ plaques and does not localize to unstable GJ plaques. Each panel  
618 includes representative bleached regions of interest, FRAP recovery curves, and bar chart of  
619 extent of recovery at 15 s post-bleach. Data shown as average  $\pm$  SEM.

620

- 621 1 Harris, A. & Locke, D. *Connexins: a guide*. (Springer Science & Business Media, 2008).
- 622 2 Duffy, H. S., Delmar, M. & Spray, D. C. Formation of the gap junction nexus: binding partners for  
623 connexins. *Journal of Physiology-Paris* **96**, 243-249 (2002).
- 624 3 Caspar, D. L., Goodenough, D. A., Makowski, L. & Phillips, W. C. Gap junction structures. I.  
625 Correlated electron microscopy and x-ray diffraction. *J. Cell Biol.* **74**, 605-628,  
626 doi:10.1083/jcb.74.2.605 (1977).
- 627 4 Stout, R. F., Jr., Snapp, E. L. & Spray, D. C. Connexin Type and Fluorescent Protein Fusion Tag  
628 Determine Structural Stability of Gap Junction Plaques. *J. Biol. Chem.* **290**, 23497-23514,  
629 doi:10.1074/jbc.M115.659979 (2015).
- 630 5 Wang, H. Y., Lin, Y. P., Mitchell, C. K., Ram, S. & O'Brien, J. Two-color fluorescent analysis of  
631 connexin 36 turnover: relationship to functional plasticity. *J. Cell Sci.* **128**, 3888-3897,  
632 doi:10.1242/jcs.162586 (2015).
- 633 6 Stout, R. F., Jr. & Spray, D. C. Cysteine residues in the cytoplasmic carboxy terminus of connexins  
634 dictate gap junction plaque stability. *Mol. Biol. Cell* **28**, 2757-2764, doi:10.1091/mbc.E17-03-  
635 0206 (2017).
- 636 7 Kojima, T. *et al.* Regulation of the blood–biliary barrier: interaction between gap and tight  
637 junctions in hepatocytes. *Medical Electron Microscopy* **36**, 157-164 (2003).
- 638 8 Nusrat, A. *et al.* The coiled-coil domain of occludin can act to organize structural and functional  
639 elements of the epithelial tight junction. *Journal of Biological Chemistry* **275**, 29816-29822  
640 (2000).
- 641 9 Hunter, A. W., Barker, R. J., Zhu, C. & Gourdie, R. G. Zonula occludens-1 alters connexin43 gap  
642 junction size and organization by influencing channel accretion. *Mol. Biol. Cell* **16**, 5686-5698,  
643 doi:10.1091/mbc.E05-08-0737 (2005).
- 644 10 Simek, J., Churko, J., Shao, Q. & Laird, D. W. Cx43 has distinct mobility within plasma-membrane  
645 domains, indicative of progressive formation of gap-junction plaques. *Journal of cell science* **122**,  
646 554-562 (2009).
- 647 11 Toyofuku, T. *et al.* Direct association of the gap junction protein connexin-43 with ZO-1 in  
648 cardiac myocytes. *J. Biol. Chem.* **273**, 12725-12731 (1998).
- 649 12 Giepmans, B. N. & Moolenaar, W. H. The gap junction protein connexin43 interacts with the  
650 second PDZ domain of the zona occludens-1 protein. *Curr. Biol.* **8**, 931-934 (1998).
- 651 13 Hunter, A. W., Jourdan, J. & Gourdie, R. G. Fusion of GFP to the carboxyl terminus of connexin43  
652 increases gap junction size in HeLa cells. *Cell communication & adhesion* **10**, 211-214 (2003).
- 653 14 Lopez, P., Balicki, D., Buehler, L. K., Falk, M. M. & Chen, S. C. Distribution and dynamics of gap  
654 junction channels revealed in living cells. *Cell communication & adhesion* **8**, 237-242 (2001).
- 655 15 Majoul, I. V. *et al.* Fast structural responses of gap junction membrane domains to AB5 toxins.  
656 *Proceedings of the National Academy of Sciences of the United States of America* **110**, E4125-  
657 4133, doi:10.1073/pnas.1315850110 (2013).
- 658 16 Adams, D. S. & Levin, M. Measuring resting membrane potential using the fluorescent voltage  
659 reporters DiBAC4(3) and CC2-DMPE. *Cold Spring Harb Protoc* **2012**, 459-464,  
660 doi:10.1101/pdb.prot067702 (2012).
- 661 17 Honsho, M., Mitoma, J. Y. & Ito, A. Retention of cytochrome b5 in the endoplasmic reticulum is  
662 transmembrane and luminal domain-dependent. *The Journal of biological chemistry* **273**, 20860-  
663 20866, doi:10.1074/jbc.273.33.20860 (1998).
- 664 18 Pedrazzini, E., Villa, A. & Borgese, N. A mutant cytochrome b5 with a lengthened membrane  
665 anchor escapes from the endoplasmic reticulum and reaches the plasma membrane. *Proc. Natl.*  
666 *Acad. Sci. U. S. A.* **93**, 4207-4212, doi:10.1073/pnas.93.9.4207 (1996).

- 667 19 Falk, M. M., Baker, S. M., Gumpert, A. M., Segretain, D. & Buckheit, R. W., 3rd. Gap junction  
668 turnover is achieved by the internalization of small endocytic double-membrane vesicles. *Mol.*  
669 *Biol. Cell* **20**, 3342-3352, doi:10.1091/mbc.E09-04-0288 (2009).
- 670 20 Defamie, N. & Mesnil, M. The modulation of gap-junctional intercellular communication by lipid  
671 rafts. *Biochimica et biophysica acta* **1818**, 1866-1869, doi:10.1016/j.bbamem.2011.09.023  
672 (2012).
- 673 21 Rhett, J. M. & Gourdie, R. G. The perinexus: a new feature of Cx43 gap junction organization.  
674 *Heart rhythm* **9**, 619-623 (2012).
- 675 22 Crane, J. M., Van Hoek, A. N., Skach, W. R. & Verkman, A. S. Aquaporin-4 Dynamics in  
676 Orthogonal Arrays in Live Cells Visualized by Quantum Dot Single Particle Tracking. *Molecular*  
677 *biology of the cell* **19**, 3369-3378, doi:10.1091/mbc.e08-03-0322 (2008).
- 678 23 O'Donovan, S. M., Sullivan, C. R. & McCullumsmith, R. E. The role of glutamate transporters in  
679 the pathophysiology of neuropsychiatric disorders. *npj Schizophrenia* **3**, 32, doi:10.1038/s41537-  
680 017-0037-1 (2017).
- 681 24 Furuse, M. *et al.* Occludin: a novel integral membrane protein localizing at tight junctions. *J. Cell*  
682 *Biol.* **123**, 1777-1788 (1993).
- 683 25 Kojima, T. *et al.* Induction of tight junctions in human connexin 32 (hCx32)-transfected mouse  
684 hepatocytes: connexin 32 interacts with occludin. *Biochem. Biophys. Res. Commun.* **266**, 222-  
685 229, doi:10.1006/bbrc.1999.1778 (1999).
- 686 26 Tence, M., Ezan, P., Amigou, E. & Giaume, C. Increased interaction of connexin43 with zonula  
687 occludens-1 during inhibition of gap junctions by G protein-coupled receptor agonists. *Cell.*  
688 *Signal.* **24**, 86-98, doi:10.1016/j.cellsig.2011.08.006 (2012).
- 689 27 Sorgen, P. L. *et al.* Structural changes in the carboxyl terminus of the gap junction protein  
690 connexin43 indicates signaling between binding domains for c-Src and zonula occludens-1.  
691 *Journal of Biological Chemistry* **279**, 54695-54701 (2004).
- 692 28 Kojima, T., Murata, M., Go, M., Spray, D. C. & Sawada, N. Connexins induce and maintain tight  
693 junctions in epithelial cells. *J. Membr. Biol.* **217**, 13-19, doi:10.1007/s00232-007-9021-4 (2007).
- 694 29 Kojima, T. *et al.* Cx32 formation and/or Cx32-mediated intercellular communication induces  
695 expression and function of tight junctions in hepatocytic cell line. *Exp. Cell Res.* **276**, 40-51,  
696 doi:10.1006/excr.2002.5511 (2002).
- 697 30 Nagasawa, K. *et al.* Possible involvement of gap junctions in the barrier function of tight  
698 junctions of brain and lung endothelial cells. *J. Cell. Physiol.* **208**, 123-132, doi:10.1002/jcp.20647  
699 (2006).
- 700 31 Sorgen, P. L. *et al.* Structural changes in the carboxyl terminus of the gap junction protein  
701 connexin43 indicates signaling between binding domains for c-Src and zonula occludens-1. *J.*  
702 *Biol. Chem.* **279**, 54695-54701, doi:10.1074/jbc.M409552200 (2004).
- 703 32 Toyofuku, T. *et al.* c-Src regulates the interaction between connexin-43 and ZO-1 in cardiac  
704 myocytes. *J. Biol. Chem.* **276**, 1780-1788, doi:10.1074/jbc.M005826200 (2001).
- 705 33 Hunter, A. W., Jourdan, J. & Gourdie, R. G. Fusion of GFP to the carboxyl terminus of connexin43  
706 increases gap junction size in HeLa cells. *Cell communication & adhesion* **10**, 211-214 (2003).
- 707 34 Hunter, A. W., Barker, R. J., Zhu, C. & Gourdie, R. G. Zonula occludens-1 alters connexin43 gap  
708 junction size and organization by influencing channel accretion. *Molecular biology of the cell* **16**,  
709 5686-5698 (2005).
- 710 35 Johnstone, S. R., Billaud, M., Lohman, A. W., Taddeo, E. P. & Isakson, B. E. Posttranslational  
711 modifications in connexins and pannexins. *The Journal of membrane biology* **245**, 319-332  
712 (2012).
- 713 36 Giepmans, B. N. & Moolenaar, W. H. The gap junction protein connexin43 interacts with the  
714 second PDZ domain of the zona occludens-1 protein. *Current Biology* **8**, 931-934 (1998).

- 715 37 Li, M. W. M., Mruk, D. D., Lee, W. M. & Cheng, C. Y. Connexin 43 is critical to maintain the  
716 homeostasis of the blood–testis barrier via its effects on tight junction reassembly. *Proceedings*  
717 *of the National Academy of Sciences*, 201007047 (2010).
- 718 38 Horng, S. *et al.* Astrocytic tight junctions control inflammatory CNS lesion pathogenesis. *J. Clin.*  
719 *Invest.* **127**, 3136-3151, doi:10.1172/JCI91301 (2017).
- 720 39 Falk, M. M., Bell, C. L., Andrews, R. M. K. & Murray, S. A. Molecular mechanisms regulating  
721 formation, trafficking and processing of annular gap junctions. *BMC cell biology* **17**, S22 (2016).
- 722 40 Thévenin, A. F. *et al.* Phosphorylation regulates connexin43/ZO-1 binding and release, an  
723 important step in gap junction turnover. *Molecular biology of the cell* **28**, 3595-3608,  
724 doi:10.1091/mbc.e16-07-0496 (2017).
- 725 41 Nagy, J. I., Patel, D., Ochalski, P. A. & Stelmack, G. L. Connexin30 in rodent, cat and human brain:  
726 selective expression in gray matter astrocytes, co-localization with connexin43 at gap junctions  
727 and late developmental appearance. *Neuroscience* **88**, 447-468 (1999).
- 728 42 Claus, L. *et al.* Barreloid Borders and Neuronal Activity Shape Panglial Gap Junction-Coupled  
729 Networks in the Mouse Thalamus. *Cereb. Cortex*, doi:10.1093/cercor/bhw368 (2016).
- 730 43 Genoud, C., Houades, V., Kraftsik, R., Welker, E. & Giaume, C. Proximity of excitatory synapses  
731 and astroglial gap junctions in layer IV of the mouse barrel cortex. *Neuroscience* **291**, 241-249,  
732 doi:10.1016/j.neuroscience.2015.01.051 (2015).
- 733 44 Orthmann-Murphy, J. L., Freidin, M., Fischer, E., Scherer, S. S. & Abrams, C. K. Two distinct  
734 heterotypic channels mediate gap junction coupling between astrocyte and oligodendrocyte  
735 connexins. *J. Neurosci.* **27**, 13949-13957, doi:10.1523/JNEUROSCI.3395-07.2007 (2007).
- 736 45 Pannasch, U. *et al.* Connexin 30 sets synaptic strength by controlling astroglial synapse invasion.  
737 *Nature neuroscience* **17**, 549 (2014).
- 738 46 Alvarez, J. I., Katayama, T. & Prat, A. Glial influence on the blood brain barrier. *Glia* **61**, 1939-  
739 1958 (2013).
- 740 47 Fanning, A. S., Ma, T. Y. & Anderson, J. M. Isolation and functional characterization of the actin  
741 binding region in the tight junction protein ZO-1. *FASEB J.* **16**, 1835-1837, doi:10.1096/fj.02-  
742 0121fje (2002).
- 743 48 Matsuda, T. & Cepko, C. L. Controlled expression of transgenes introduced by in vivo  
744 electroporation. *Proc. Natl. Acad. Sci. U. S. A.* **104**, 1027-1032, doi:10.1073/pnas.0610155104  
745 (2007).
- 746 49 Underhill, S. M., Wheeler, D. S. & Amara, S. G. Differential regulation of two isoforms of the glial  
747 glutamate transporter EAAT2 by DLG1 and CaMKII. *J. Neurosci.* **35**, 5260-5270,  
748 doi:10.1523/JNEUROSCI.4365-14.2015 (2015).
- 749 50 Bulbarelli, A., Sprocati, T., Barberi, M., Pedrazzini, E. & Borgese, N. Trafficking of tail-anchored  
750 proteins: transport from the endoplasmic reticulum to the plasma membrane and sorting  
751 between surface domains in polarised epithelial cells. *J. Cell Sci.* **115**, 1689-1702 (2002).
- 752 51 Benesty, J., Chen, J., Huang, Y. & Cohen, I. in *Noise reduction in speech processing* 1-4  
753 (Springer, 2009).
- 754 52 Stout Jr, R. F. & Spray, D. C. in *Gap Junction Channels and Hemichannels Methods in Signal*  
755 *Transduction Series* 63-91 (CRC Press, 2016).
- 756 53 Snapp, E. L. & Lajoie, P. Photobleaching regions of living cells to monitor membrane traffic. *Cold*  
757 *Spring Harbor protocols* **2011**, 1366-1367, doi:10.1101/pdb.prot066563 (2011).
- 758 54 Blumenthal, D., Goldstien, L., Edidin, M. & Gheber, L. A. Universal Approach to FRAP Analysis of  
759 Arbitrary Bleaching Patterns. *Sci. Rep.* **5**, 11655, doi:10.1038/srep11655 (2015).
- 760 55 Schindelin, J. *et al.* Fiji: an open-source platform for biological-image analysis. *Nature methods* **9**,  
761 676-682, doi:10.1038/nmeth.2019 (2012).

762 56 Schneider, C. A., Rasband, W. S. & Eliceiri, K. W. NIH Image to ImageJ: 25 years of image analysis.  
763 *Nature methods* **9**, 671-675 (2012).

764

765

766

767



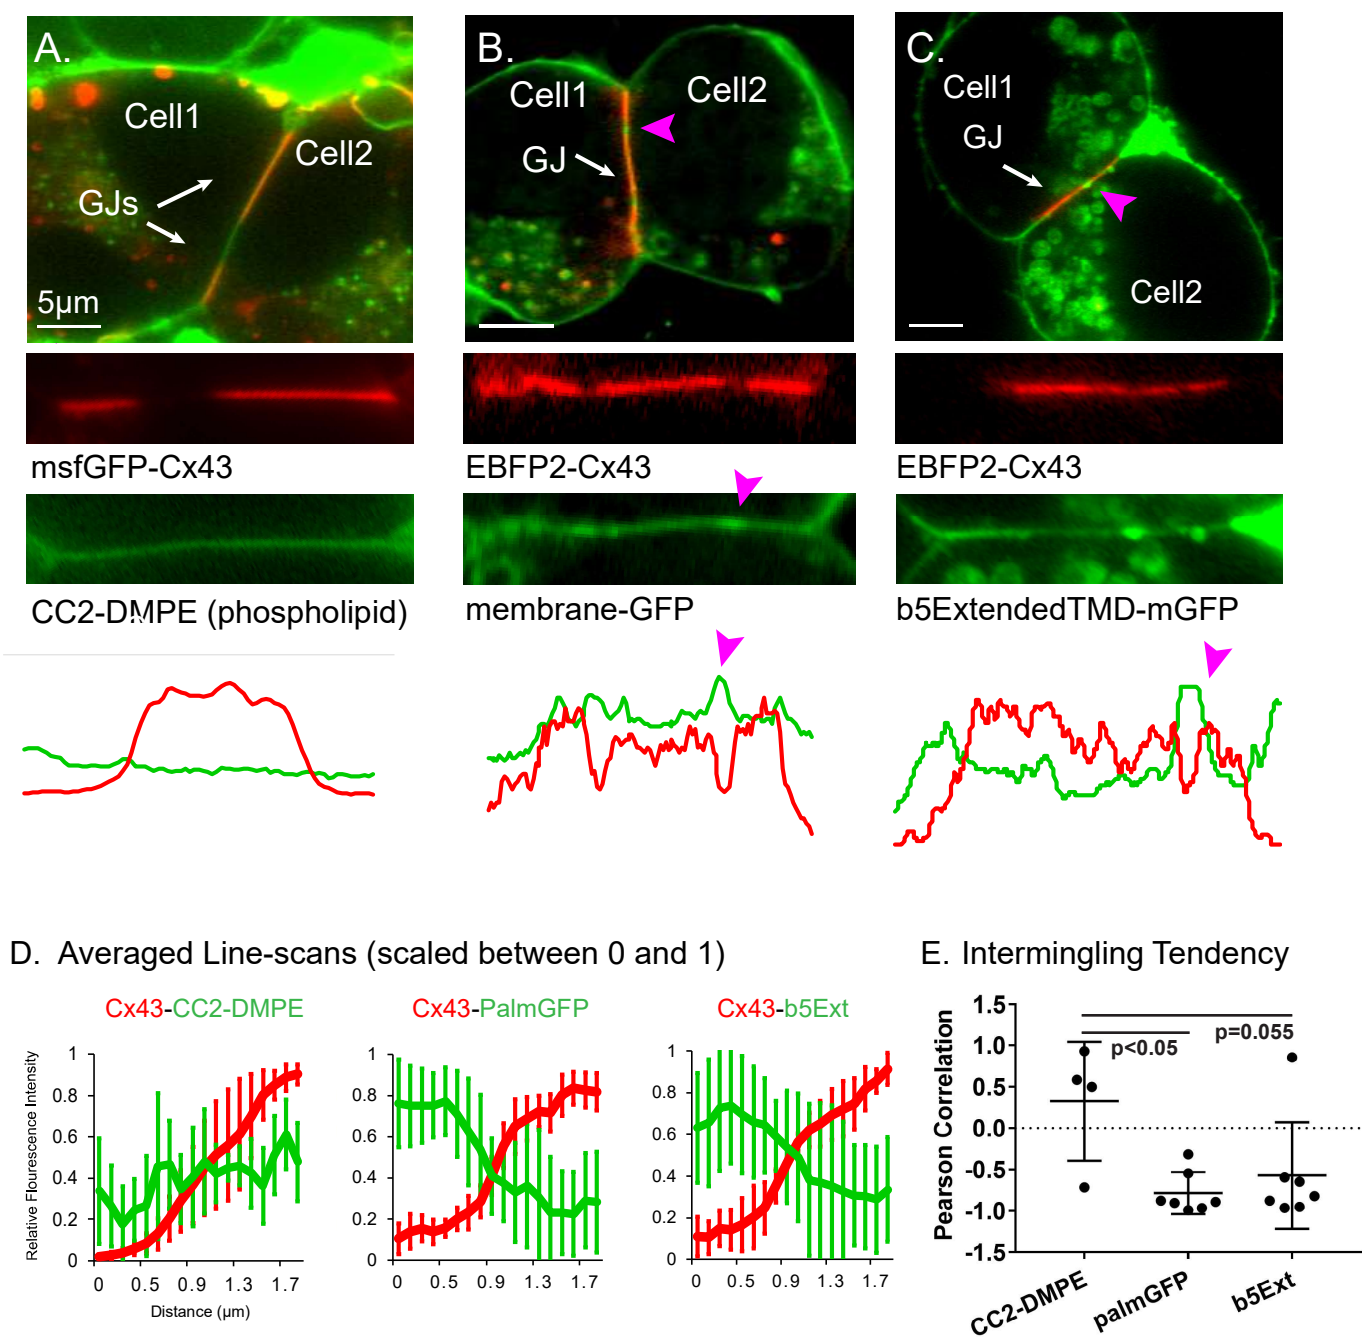

Figure 2. Gap junction plaques determine protein localization in diverse manners.

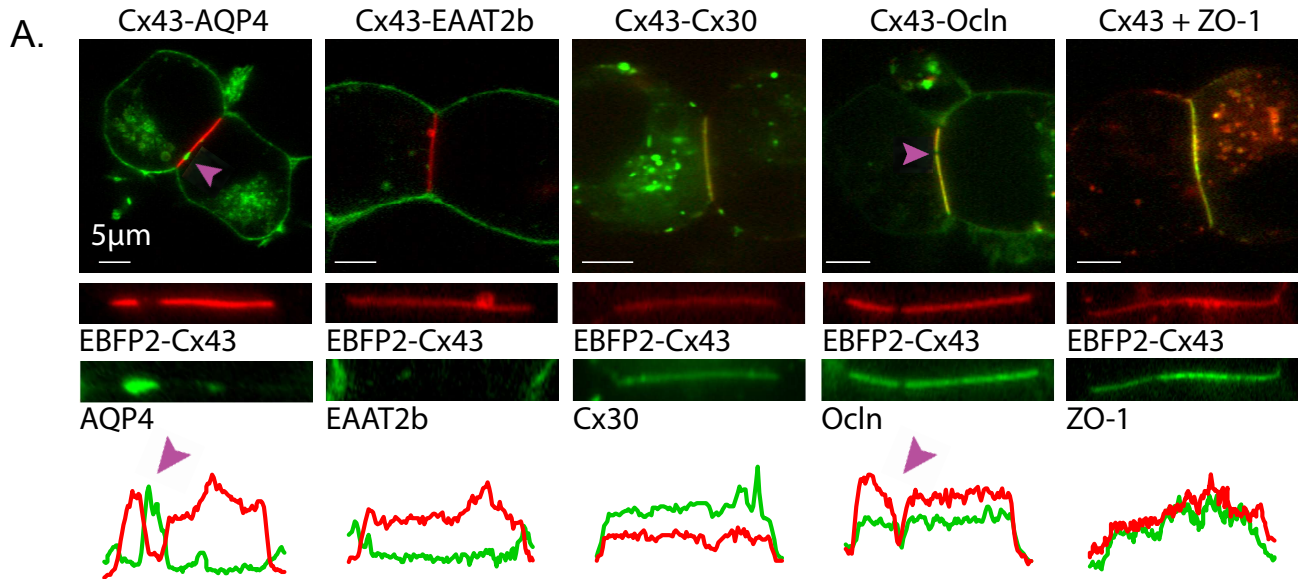

**B.** Averaged Line-scans (scaled between 0 and 1) at edge of Cx43 plaque

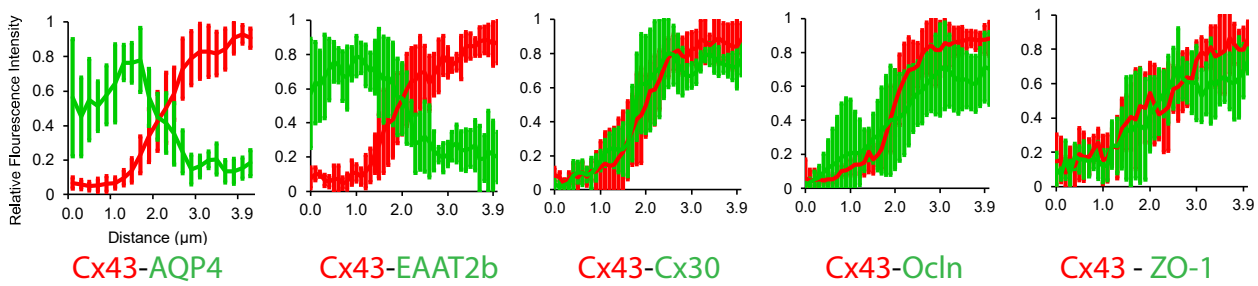

p<0.05

**C.** Intermingling Tendency with Cx43

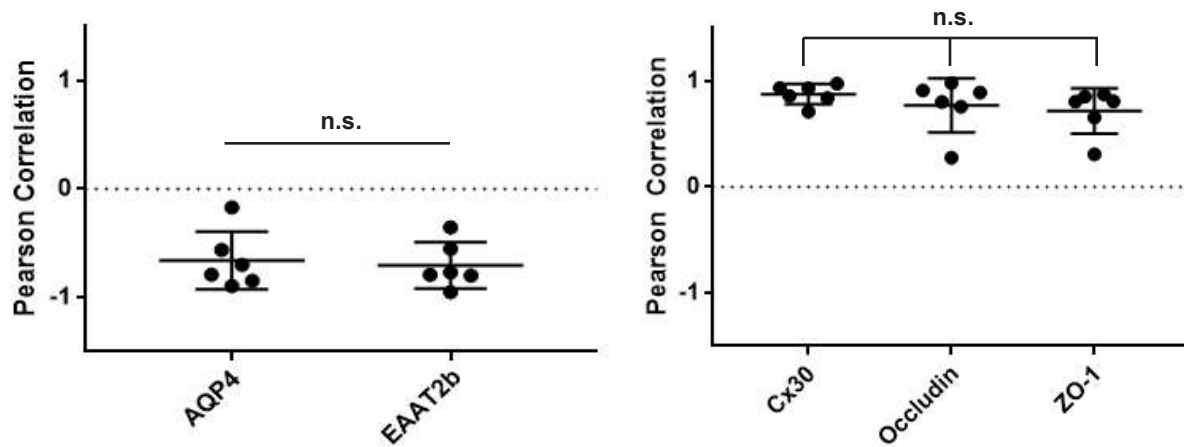

Figure 3. The attractive effect of GJ plaques requires specific connexin sequences.

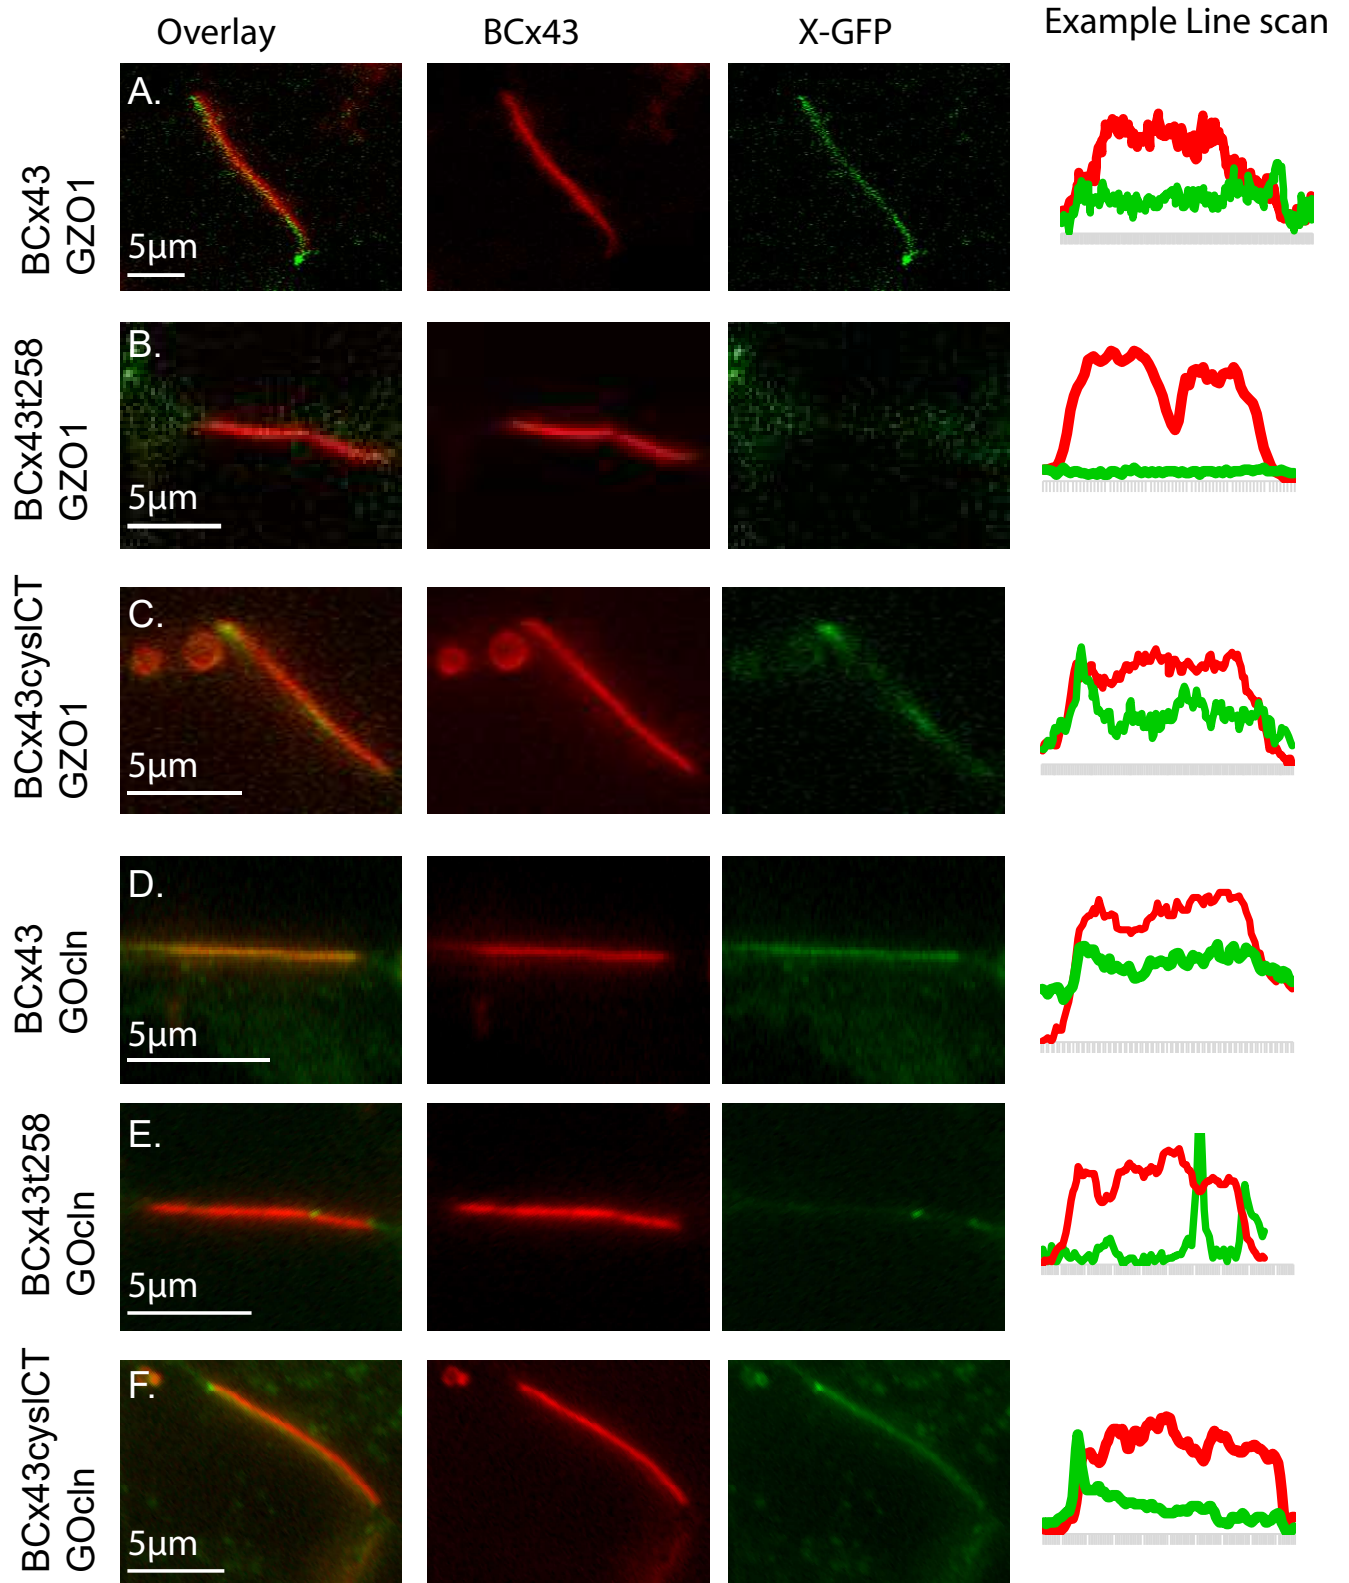

Figure 4. Cx43 and AQP4 clusters mostly do not overlap in example ex vivo images.

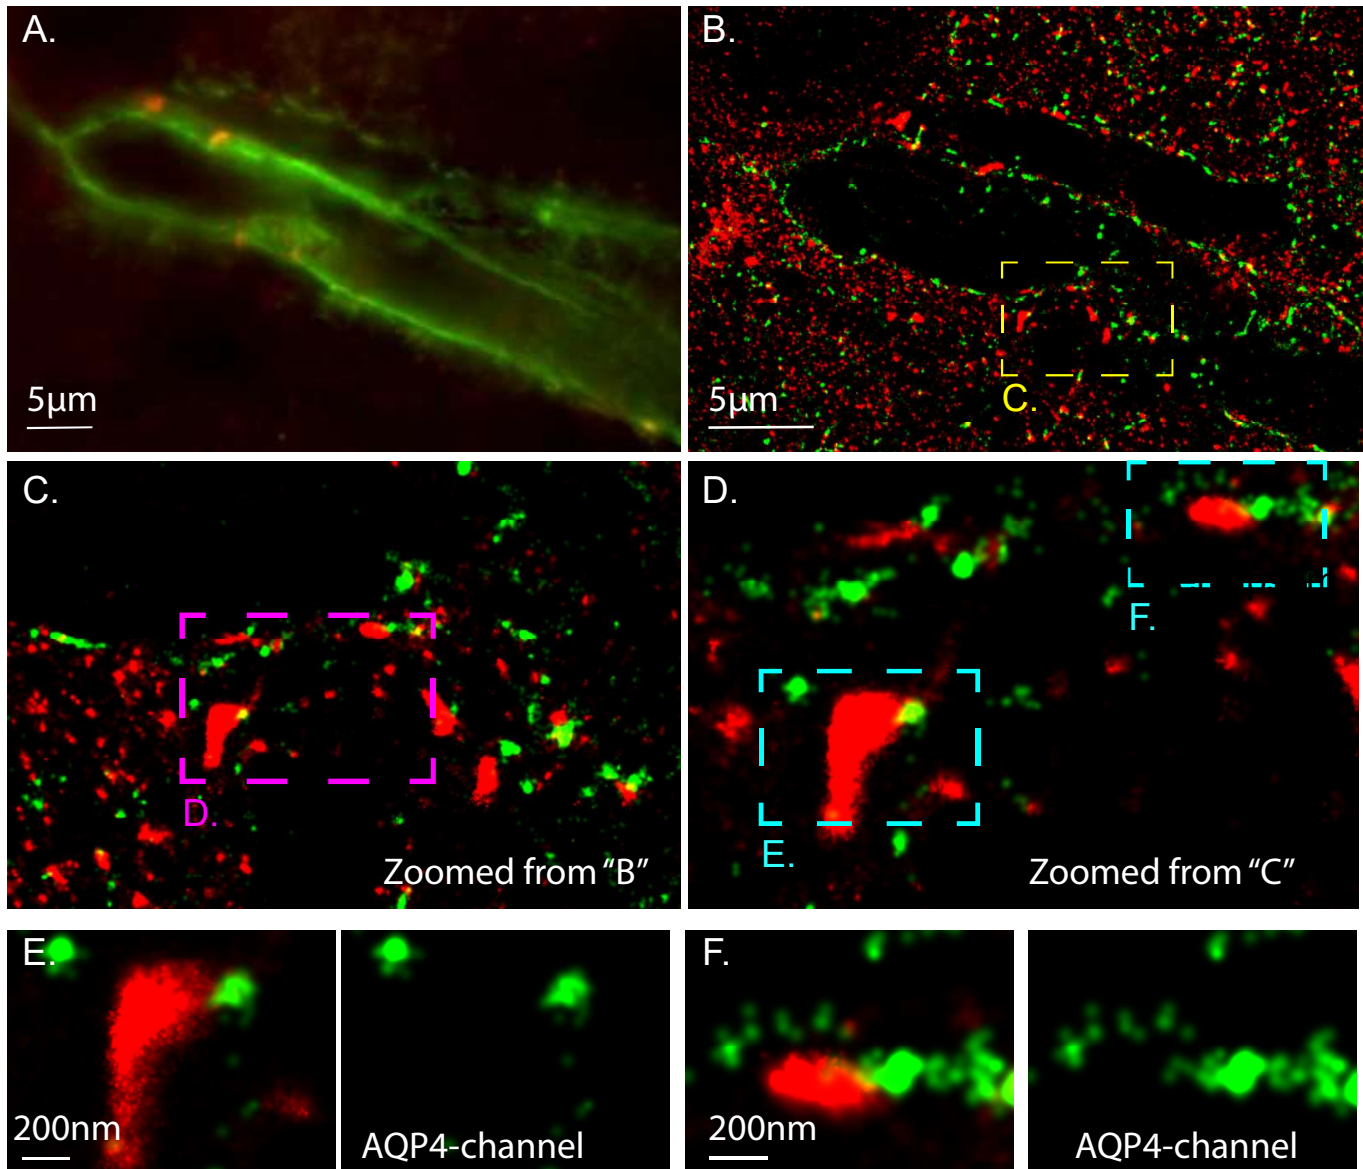

A. Aquaporin 4 and EAAT2b are excluded from Cx43 plaques and have low non-plaque diffusivity in the membrane.

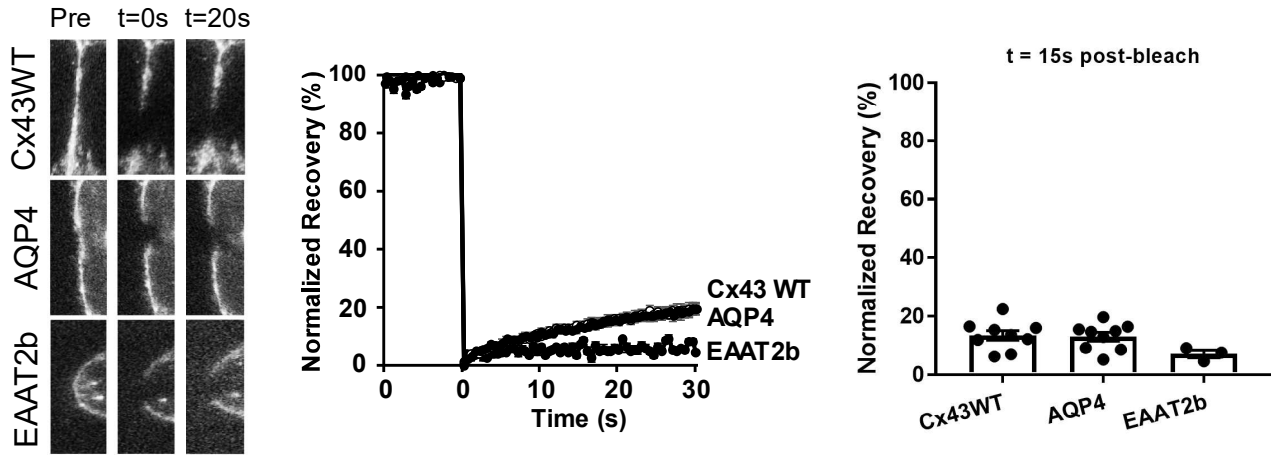

B. Membrane tethered fluorophores and membrane associated proteins are mobile outside of gap junction plaques.

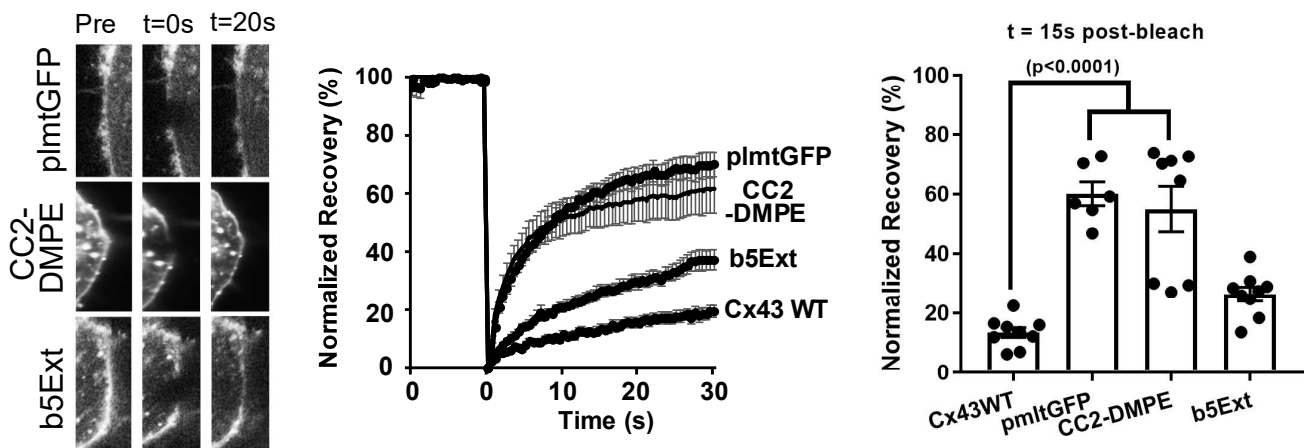

C. Connexin 30, Occludin, and ZO-1 are mobile in the cell membrane outside of gap junction plaques.

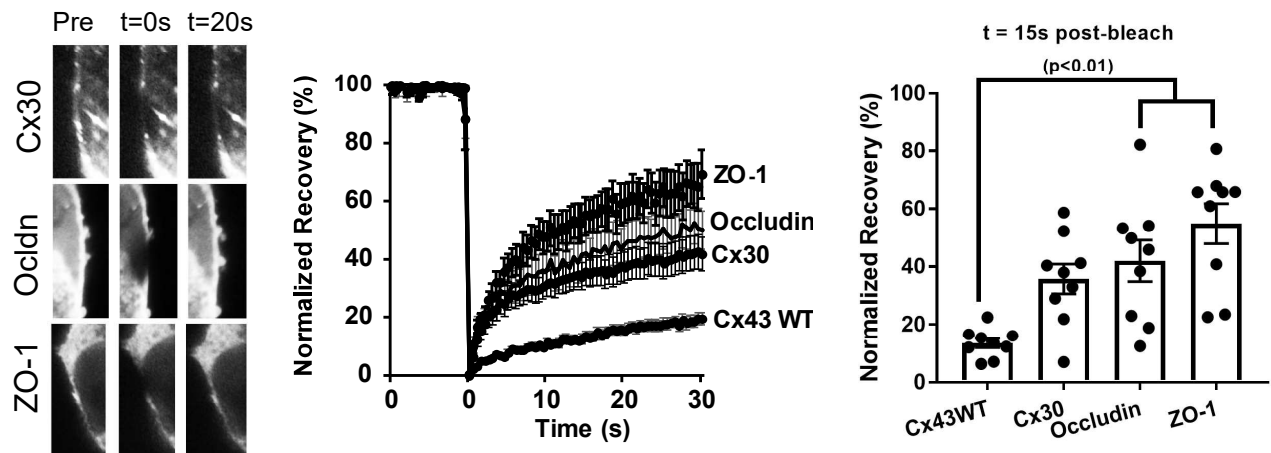

A. The coumarin-conjugated phospholipid CC2-DMPE is mobile within GJ plaques.

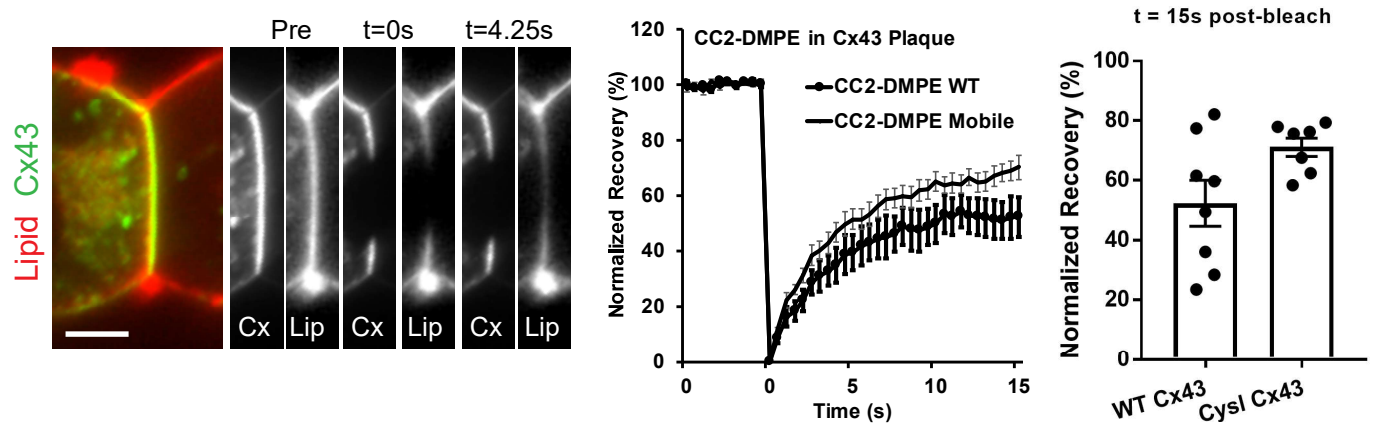

B. Membrane-tethered GFP is mobile within gap junction plaques.

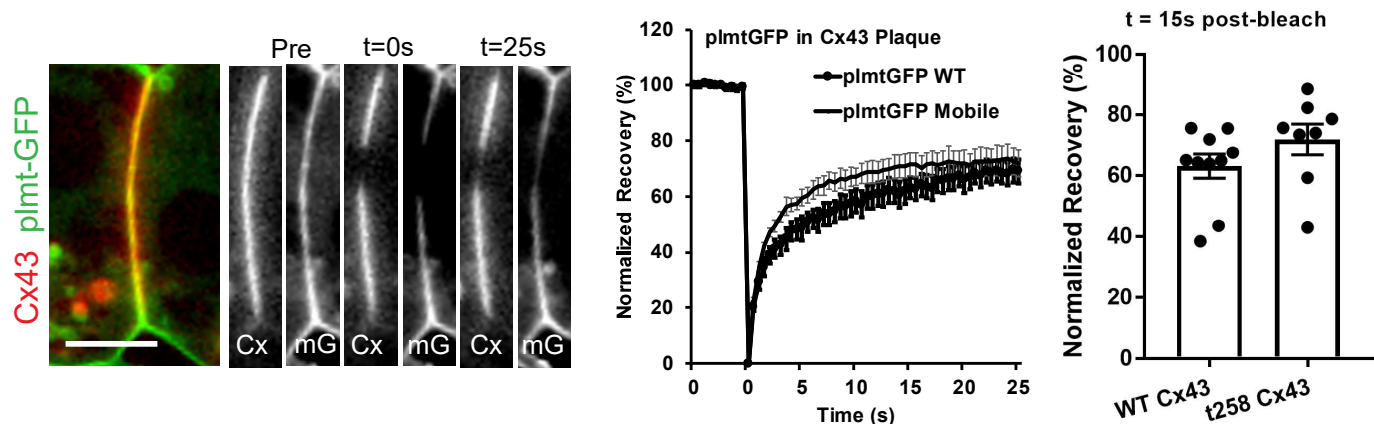

C. The single-pass transmembrane protein b5Extended is mobile in stable GJs.

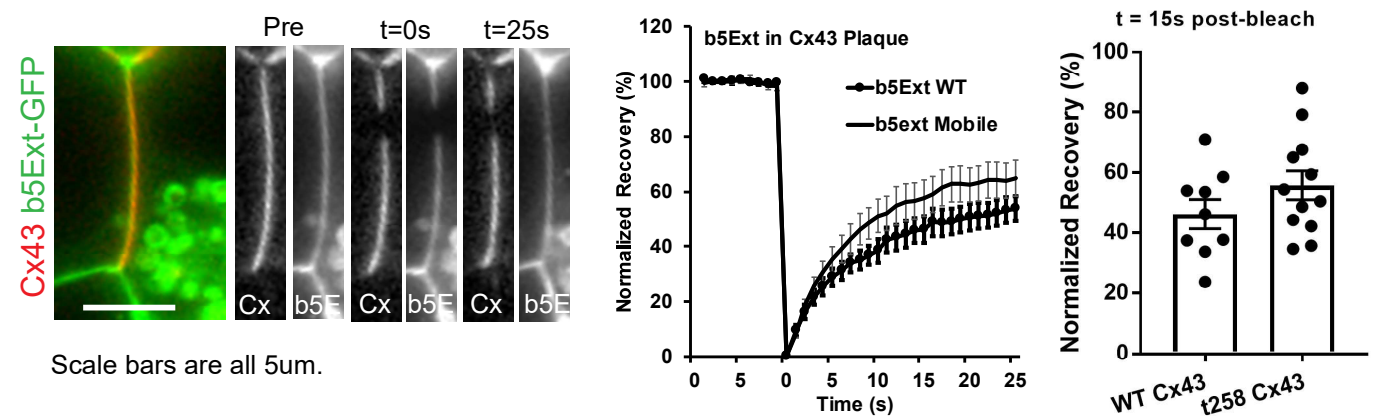

Scale bars are all 5 $\mu$ m.

A. Cx30 is more mobile in unstable GJ plaques than WT plaques.

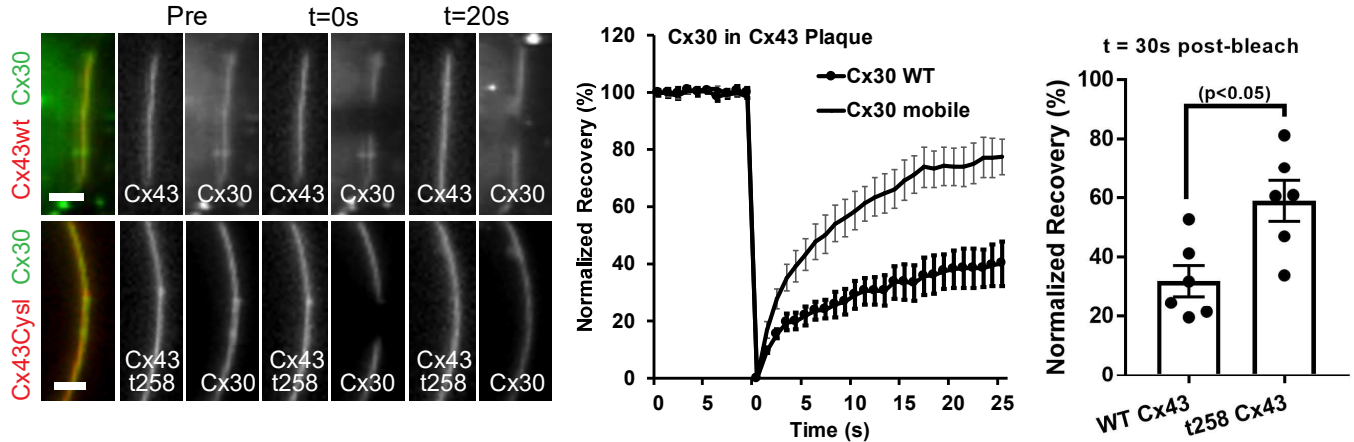

B. Occludin is mobile within both WT and cyslessCT Cx43 plaques.

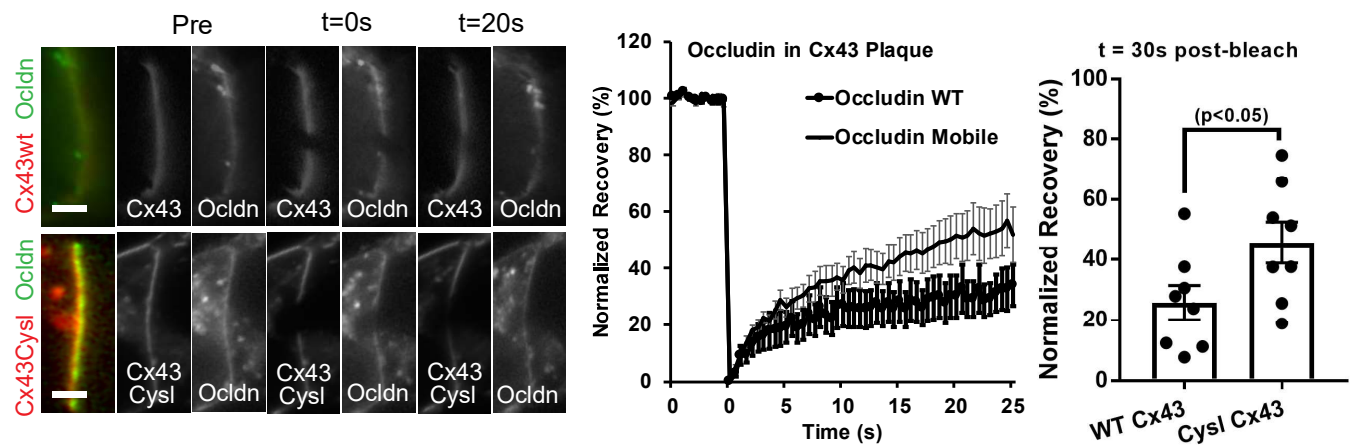

C. ZO-1 is mobile within stable and CyslessCT mobile GJ plaques.

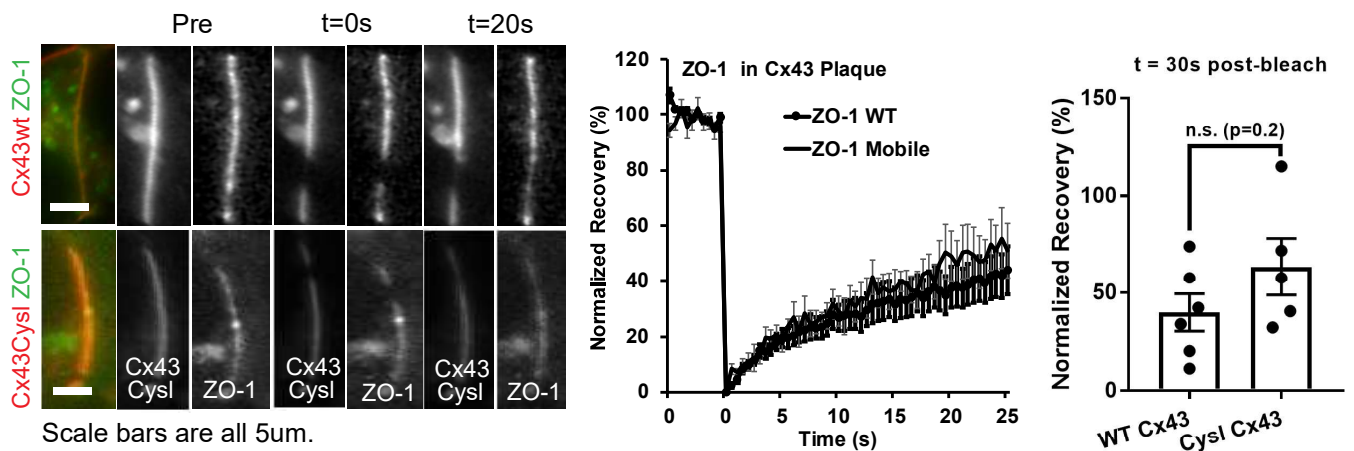

Source: https://www.biorxiv.org/content/10.1101/2020.04.06.027540v1.full.pdf
